# Supplementary material for: Glial betaPix is essential for blood vessel development in the zebrafish brain
Source: eLife. 2026 Jan 16;14:RP106665. doi: 10.7554/eLife.106665 (PMC12810955; doi:10.7554/eLife.106665)
Supplement: Supplementary file 1. [file elife-106665-supp1.xlsx]

## Sheet: Supplementary File 1
Supplementary File 1 | merge.seu_res_2.5_logfc0.25_mar
p_val	avg_log2FC	pct.1	pct.2	p_val_adj	cluster	gene
0	2.55838	0.828	0.321	0	Neuron	elavl4
0	2.3008	0.863	0.255	0	Neuron	sncb
0	2.18716	0.769	0.577	0	Neuron	zfhx4
0	2.1661	0.665	0.254	0	Neuron	si:ch211-195b15.8
0	2.16006	0.687	0.229	0	Neuron	stmn4l
0	2.1207	0.799	0.576	0	Neuron	zfhx3
0	2.09562	0.79	0.224	0	Neuron	stx1b
0	2.08427	0.554	0.135	0	Neuron	nrn1a
0	2.07152	0.898	0.411	0	Neuron	stmn1b
0	2.06938	0.628	0.368	0	Neuron	ebf3a.1
0	2.04084	0.774	0.327	0	Neuron	ywhag2
0	1.98799	0.749	0.202	0	Neuron	rtn1b
0	1.96296	0.479	0.131	0	Neuron	adcyap1b
0	1.95921	0.841	0.347	0	Neuron	gpm6ab
0	1.92465	0.809	0.361	0	Neuron	atp6v0cb
0	1.90707	0.955	0.761	0	Neuron	tuba1c
0	1.85946	0.749	0.184	0	Neuron	gng3
0	1.85478	0.952	0.618	0	Neuron	rtn1a
0	1.8174	0.367	0.086	0	Neuron	islr2
0	1.80269	0.588	0.112	0	Neuron	nrxn1a
0	1.78992	0.579	0.121	0	Neuron	sv2a
0	1.78385	0.559	0.16	0	Neuron	gap43
0	1.78351	0.772	0.454	0	Neuron	tubb5
0	1.77236	0.69	0.142	0	Neuron	aplp1
0	1.77049	0.665	0.154	0	Neuron	atp1a3a
0	1.77033	0.577	0.138	0	Neuron	snap25a
0	1.76321	0.892	0.753	0	Neuron	calm1a
0	1.758	0.507	0.304	0	Neuron	mab21l2
0	1.73024	0.831	0.517	0	Neuron	zc4h2
0	1.72633	0.425	0.249	0	Neuron	meis2a
0	1.72615	0.558	0.126	0	Neuron	syt1a
0	1.70314	0.669	0.16	0	Neuron	stxbp1a
0	1.69851	0.766	0.456	0	Neuron	cd99l2
0	1.69008	0.589	0.131	0	Neuron	map1aa
0	1.68865	0.827	0.638	0	Neuron	tnrc6c1
0	1.6793	0.717	0.19	0	Neuron	vamp2
0	1.67436	0.596	0.319	0	Neuron	pbx3b
0	1.6636	0.81	0.367	0	Neuron	ckbb
0	1.6585	0.421	0.085	0	Neuron	rbfox3a
0	1.65554	0.783	0.297	0	Neuron	gng2
0	1.62498	0.489	0.208	0	Neuron	pou2f2a
0	1.61876	0.635	0.124	0	Neuron	ppfia3
0	1.58912	0.555	0.228	0	Neuron	nanos1
0	1.58777	0.495	0.138	0	Neuron	rbfox1
0	1.58661	0.739	0.336	0	Neuron	tmsb
0	1.57524	0.833	0.608	0	Neuron	ywhah
0	1.5733	0.291	0.103	0	Neuron	lhx9
0	1.57281	0.518	0.125	0	Neuron	gas7a
0	1.57232	0.733	0.378	0	Neuron	ank2b
0	1.56953	0.585	0.157	0	Neuron	id4
0	1.56787	0.379	0.097	0	Neuron	camk2n1a
0	1.56774	0.763	0.455	0	Neuron	sox4a.1
0	1.56116	0.591	0.164	0	Neuron	slc1a2b
0	1.55272	0.452	0.226	0	Neuron	r3hdm1
0	1.54635	0.602	0.128	0	Neuron	kif1aa
0	1.54017	0.518	0.294	0	Neuron	pou2f2a.1
0	1.51541	0.548	0.113	0	Neuron	basp1
0	1.51527	0.562	0.125	0	Neuron	tuba2
0	1.51064	0.365	0.103	0	Neuron	lhx1a
0	1.50582	0.501	0.29	0	Neuron	mab21l1
0	1.48295	0.494	0.11	0	Neuron	stmn2a
0	1.4796	0.868	0.661	0	Neuron	hmgb3a
0	1.47823	0.693	0.203	0	Neuron	fez1
0	1.47522	0.965	0.627	0	Neuron	elavl3
0	1.47342	0.524	0.109	0	Neuron	rai1
0	1.4709	0.563	0.11	0	Neuron	sypa
0	1.46891	0.513	0.274	0	Neuron	msi2b
0	1.44588	0.293	0.095	0	Neuron	bcl11ba
0	1.44565	0.461	0.103	0	Neuron	olfm1b
0	1.42321	0.656	0.311	0	Neuron	appb
0	1.41648	0.661	0.367	0	Neuron	pbx1a
0	1.4132	0.864	0.691	0	Neuron	si:dkey-276j7.1
0	1.4017	0.75	0.423	0	Neuron	rnasekb
0	1.40061	0.556	0.151	0	Neuron	cadm4
0	1.39683	0.76	0.597	0	Neuron	si:ch73-386h18.1
0	1.39608	0.505	0.119	0	Neuron	zgc:65894
0	1.39229	0.517	0.092	0	Neuron	gpr85
0	1.37418	0.45	0.099	0	Neuron	syt2a
0	1.3709	0.573	0.248	0	Neuron	kidins220b
0	1.36645	0.627	0.42	0	Neuron	pik3r3b
0	1.35095	0.56	0.125	0	Neuron	ndrg4
0	1.34951	0.679	0.432	0	Neuron	tnrc6c2
0	1.3455	0.498	0.261	0	Neuron	rgmb
0	1.34206	0.698	0.518	0	Neuron	calm2a
0	1.33916	0.508	0.094	0	Neuron	dclk1b
0	1.33636	0.439	0.128	0	Neuron	sox4b
0	1.32675	0.508	0.11	0	Neuron	cpe
0	1.32513	0.327	0.122	0	Neuron	uncx
0	1.32302	0.257	0.063	0	Neuron	BX005003.1
0	1.31988	0.7	0.416	0	Neuron	apc
0	1.31932	0.506	0.168	0	Neuron	nhlh2
0	1.31745	0.761	0.414	0	Neuron	C7H4orf48
0	1.31438	0.877	0.618	0	Neuron	gpm6aa
0	1.31425	0.612	0.181	0	Neuron	csdc2a
0	1.31136	0.757	0.562	0	Neuron	appa
0	1.30272	0.779	0.554	0	Neuron	tmeff1b
0	1.29571	0.51	0.101	0	Neuron	tmem59l
0	1.29014	0.294	0.055	0	Neuron	nell2b
0	1.28989	0.495	0.106	0	Neuron	stmn2b
0	1.28893	0.437	0.118	0	Neuron	ppp1r14c
0	1.28064	0.369	0.182	0	Neuron	robo3
0	1.27872	0.412	0.23	0	Neuron	meis2a.1
0	1.27639	0.514	0.1	0	Neuron	CRACD
0	1.26968	0.583	0.124	0	Neuron	carmil2
0	1.26861	0.544	0.136	0	Neuron	map4l
0	1.26778	0.343	0.073	0	Neuron	scg2b
0	1.26756	0.541	0.142	0	Neuron	nsg2
0	1.26334	0.354	0.092	0	Neuron	robo2.1
0	1.26191	0.615	0.445	0	Neuron	celf2
0	1.2599	0.341	0.153	0	Neuron	plxna4
0	1.25872	0.974	0.83	0	Neuron	nova2
0	1.25351	0.151	0.027	0	Neuron	pou4f1
0	1.24217	0.984	0.946	0	Neuron	ptmaa
0	1.23599	0.728	0.542	0	Neuron	atp6v1g1
0	1.23138	0.451	0.082	0	Neuron	pcloa
0	1.23097	0.345	0.084	0	Neuron	lhx5
0	1.22899	0.82	0.667	0	Neuron	gapdhs
0	1.22762	0.428	0.108	0	Neuron	cplx2
0	1.22677	0.702	0.418	0	Neuron	kdm6bb
0	1.22571	0.574	0.267	0	Neuron	elmo1
0	1.21721	0.657	0.389	0	Neuron	atp1b2a
0	1.21719	0.441	0.083	0	Neuron	pclob
0	1.20943	0.444	0.117	0	Neuron	tmem178b
0	1.20814	0.719	0.516	0	Neuron	serinc1
0	1.20697	0.261	0.069	0	Neuron	stmn4
0	1.20502	0.462	0.083	0	Neuron	nrsn1
0	1.19711	0.403	0.077	0	Neuron	tmsb2
0	1.18849	0.703	0.499	0	Neuron	prr12b
0	1.18719	0.563	0.426	0	Neuron	cspg5a
0	1.17679	0.79	0.566	0	Neuron	epb41a
0	1.17127	0.478	0.092	0	Neuron	pacsin1a
0	1.1661	0.408	0.11	0	Neuron	cxxc4
0	1.16593	0.255	0.081	0	Neuron	slc32a1
0	1.16367	0.327	0.158	0	Neuron	lmo3
0	1.16354	0.5	0.1	0	Neuron	si:ch211-150g13.3
0	1.16212	0.504	0.108	0	Neuron	adam22
0	1.16193	0.465	0.123	0	Neuron	thsd7aa
0	1.16068	0.554	0.164	0	Neuron	atcaya
0	1.15668	0.569	0.404	0	Neuron	calm1b
0	1.1534	0.378	0.062	0	Neuron	mtus2a
0	1.15201	0.536	0.31	0	Neuron	cpeb4b
0	1.15129	0.656	0.362	0	Neuron	rtn4b
0	1.14678	0.744	0.63	0	Neuron	ankrd12
0	1.14631	0.4	0.078	0	Neuron	sypb
0	1.14538	0.397	0.237	0	Neuron	robo1
0	1.14472	0.313	0.11	0	Neuron	onecut1
0	1.13951	0.632	0.355	0	Neuron	atp6v1e1b
0	1.13904	0.42	0.105	0	Neuron	eno2
0	1.13836	0.613	0.241	0	Neuron	golga7ba
0	1.1381	0.49	0.13	0	Neuron	sgip1a
0	1.13502	0.494	0.153	0	Neuron	syt11a
0	1.13445	0.341	0.051	0	Neuron	slc17a6b
0	1.13439	0.617	0.4	0	Neuron	atp2b1a
0	1.13073	0.737	0.558	0	Neuron	macroh2a2
0	1.13012	0.591	0.287	0	Neuron	dnajc5aa
0	1.1244	0.842	0.704	0	Neuron	jpt1b
0	1.12089	0.498	0.118	0	Neuron	map7d2a
0	1.11519	0.444	0.095	0	Neuron	ank3a
0	1.11505	0.452	0.084	0	Neuron	si:dkey-40m6.8
0	1.1104	0.42	0.086	0	Neuron	map7d2b
0	1.10966	0.467	0.083	0	Neuron	apc2
0	1.10822	0.474	0.139	0	Neuron	nexmifa
0	1.10658	0.415	0.076	0	Neuron	glrbb
0	1.10593	0.478	0.099	0	Neuron	nsfa
0	1.10421	0.531	0.248	0	Neuron	cbx1b
0	1.10343	0.51	0.163	0	Neuron	dab2ipa
0	1.1031	0.821	0.691	0	Neuron	hnrnpa0a
0	1.10234	0.485	0.25	0	Neuron	auts2a
0	1.09699	0.58	0.257	0	Neuron	gnao1a
0	1.09385	0.329	0.05	0	Neuron	si:dkeyp-72g9.4
0	1.09288	0.385	0.077	0	Neuron	ptpn5
0	1.09238	0.543	0.236	0	Neuron	camta1b
0	1.08966	0.62	0.484	0	Neuron	slc1a4
0	1.08932	0.431	0.082	0	Neuron	si:dkey-12h9.6
0	1.08616	0.331	0.051	0	Neuron	zgc:165603
0	1.07903	0.456	0.095	0	Neuron	kif5aa
0	1.07628	0.527	0.156	0	Neuron	dpysl3
0	1.06709	0.603	0.382	0	Neuron	clstn1
0	1.06451	0.691	0.431	0	Neuron	rbfox2
0	1.06219	0.473	0.251	0	Neuron	kif1b
0	1.05649	0.999	1	0	Neuron	CR383676.2
0	1.05519	0.349	0.061	0	Neuron	kcnma1a
0	1.05011	0.287	0.045	0	Neuron	nrxn2a
0	1.04778	0.412	0.068	0	Neuron	si:dkey-178k16.1
0	1.04666	0.424	0.112	0	Neuron	mllt11
0	1.04331	0.363	0.07	0	Neuron	spock1
0	1.0401	0.397	0.079	0	Neuron	ppp1r14ba
0	1.0366	0.551	0.419	0	Neuron	cxxc5a
0	1.0327	0.524	0.24	0	Neuron	rapgef2
0	1.02757	0.36	0.145	0	Neuron	aff2
0	1.02688	0.63	0.321	0	Neuron	celf3a
0	1.02535	0.375	0.071	0	Neuron	celf4
0	1.01457	0.435	0.121	0	Neuron	si:dkey-280e21.3
0	1.01449	0.798	0.69	0	Neuron	ccni
0	1.01334	0.427	0.102	0	Neuron	add2
0	1.01298	0.783	0.74	0	Neuron	si:ch211-196l7.4
0	1.01261	0.728	0.49	0	Neuron	tmem35
0	1.01137	0.894	0.86	0	Neuron	chac1
0	1.00951	0.842	0.8	0	Neuron	calm3a
0	1.00874	0.447	0.205	0	Neuron	cxxc5b
0	1.00537	0.482	0.161	0	Neuron	atpv0e2
0	1.00527	0.276	0.101	0	Neuron	pcdh7b
0	0.999947	0.988	0.949	0	Neuron	marcksl1b
0	0.997987	0.48	0.105	0	Neuron	jagn1a
0	0.993264	0.493	0.207	0	Neuron	nbeaa
0	0.989964	0.285	0.064	0	Neuron	phlda1
0	0.985653	0.486	0.146	0	Neuron	ctnna2
0	0.981625	0.666	0.486	0	Neuron	fscn1a
0	0.974074	0.374	0.063	0	Neuron	sult4a1
0	0.972889	0.868	0.82	0	Neuron	sumo2b
0	0.969064	0.499	0.333	0	Neuron	soga1
0	0.966545	0.32	0.063	0	Neuron	cplx2l
0	0.965484	0.398	0.076	0	Neuron	phactr3a
0	0.964353	0.444	0.269	0	Neuron	tox2
0	0.959848	0.45	0.189	0	Neuron	pde4ba
0	0.958094	0.228	0.033	0	Neuron	srgap1b
0	0.957753	0.379	0.059	0	Neuron	st8sia5
0	0.955146	0.857	0.707	0	Neuron	tuba1a
0	0.954865	0.777	0.649	0	Neuron	fam168a
0	0.948517	0.396	0.087	0	Neuron	smarcc2
0	0.942203	0.39	0.083	0	Neuron	scg5
0	0.940555	0.307	0.073	0	Neuron	maptb
0	0.939757	0.305	0.063	0	Neuron	FP085414.1
0	0.938198	0.554	0.392	0	Neuron	mycbp2
0	0.934237	0.462	0.141	0	Neuron	si:dkey-81l17.6
0	0.933886	0.652	0.492	0	Neuron	ubap2a
0	0.933628	0.699	0.572	0	Neuron	zgc:110158
0	0.933061	0.504	0.279	0	Neuron	igdcc3
0	0.931893	0.378	0.107	0	Neuron	hpca
0	0.931281	0.791	0.722	0	Neuron	ppdpfb
0	0.927648	0.323	0.046	0	Neuron	fut9a
0	0.92639	0.761	0.697	0	Neuron	tardbp
0	0.922193	0.362	0.136	0	Neuron	chn1
0	0.919718	0.75	0.618	0	Neuron	atrx
0	0.918333	0.503	0.266	0	Neuron	nat16
0	0.9155	0.346	0.056	0	Neuron	gphnb
0	0.913814	0.308	0.058	0	Neuron	pcsk1nl
0	0.910038	0.665	0.533	0	Neuron	dnaja2b
0	0.908778	0.232	0.042	0	Neuron	ntrk3a
0	0.905945	0.469	0.201	0	Neuron	lcor
0	0.903833	0.425	0.128	0	Neuron	necap1
0	0.900963	0.422	0.184	0	Neuron	runx1t1
0	0.90003	0.401	0.094	0	Neuron	XKR4
0	0.899303	0.458	0.159	0	Neuron	palm1b
0	0.8989	0.471	0.167	0	Neuron	mpp2a
0	0.897417	0.694	0.598	0	Neuron	calm3b
0	0.897312	0.515	0.338	0	Neuron	ppp3r1a
0	0.897017	0.878	0.827	0	Neuron	gnb1b
0	0.894681	0.393	0.094	0	Neuron	apba2b
0	0.894166	0.427	0.148	0	Neuron	zgc:109889
0	0.89161	0.318	0.061	0	Neuron	CAMK2N1
0	0.889867	0.818	0.772	0	Neuron	hp1bp3
0	0.889442	0.191	0.028	0	Neuron	CR786577.1
0	0.8885	0.259	0.088	0	Neuron	arhgdig
0	0.887217	0.284	0.068	0	Neuron	fam184b
0	0.886419	0.592	0.389	0	Neuron	ube2d4
0	0.886169	0.337	0.126	0	Neuron	atp1b3b
0	0.885215	0.592	0.386	0	Neuron	cyfip2
0	0.884348	0.223	0.058	0	Neuron	kif26ba
0	0.884113	0.346	0.16	0	Neuron	ywhag1
0	0.882931	0.677	0.547	0	Neuron	ing4
0	0.878982	0.713	0.613	0	Neuron	si:ch73-46j18.5
0	0.8783	0.553	0.394	0	Neuron	bach2b
0	0.8779	0.333	0.057	0	Neuron	dctn1b
0	0.876356	0.531	0.351	0	Neuron	atp6ap2
0	0.875568	0.759	0.698	0	Neuron	zswim5
0	0.875043	0.448	0.172	0	Neuron	ccdc85b
0	0.871804	0.422	0.149	0	Neuron	pdia8
0	0.870132	0.402	0.1	0	Neuron	si:dkey-56f14.7
0	0.869801	0.248	0.043	0	Neuron	myt1la
0	0.869691	0.539	0.371	0	Neuron	gabarapl2
0	0.869546	0.382	0.093	0	Neuron	tspan7b
0	0.867572	0.385	0.173	0	Neuron	dnmt3ab
0	0.865544	0.357	0.064	0	Neuron	mcf2l2
0	0.864453	0.299	0.056	0	Neuron	ppfia4
0	0.863238	0.352	0.098	0	Neuron	cd9a
0	0.859611	0.596	0.364	0	Neuron	myt1b
0	0.859101	0.403	0.085	0	Neuron	mapk10
0	0.857411	0.838	0.798	0	Neuron	oaz1b
0	0.856491	0.698	0.575	0	Neuron	tet3
0	0.856167	0.366	0.081	0	Neuron	rac3a
0	0.854939	0.855	0.776	0	Neuron	marcksb
0	0.854847	0.226	0.062	0	Neuron	nrxn3a
0	0.853317	0.818	0.766	0	Neuron	hmgb1a
0	0.852356	0.353	0.105	0	Neuron	bsnb
0	0.849215	0.474	0.224	0	Neuron	dpysl2b
0	0.848073	0.364	0.101	0	Neuron	psd2
0	0.847225	0.859	0.803	0	Neuron	hmgn7
0	0.846051	0.427	0.124	0	Neuron	pak1
0	0.845304	0.418	0.166	0	Neuron	nfasca
0	0.843621	0.853	0.796	0	Neuron	gnb1a
0	0.841672	0.354	0.104	0	Neuron	GNAZ
0	0.84083	0.408	0.18	0	Neuron	iqsec1b
0	0.840106	0.516	0.307	0	Neuron	pcdh2g28
0	0.839904	0.787	0.724	0	Neuron	rab2a
0	0.839311	0.359	0.187	0	Neuron	hrasb
0	0.839304	0.855	0.786	0	Neuron	h2ax1
0	0.837022	0.317	0.063	0	Neuron	rab3ab
0	0.835591	0.34	0.077	0	Neuron	rab11bb
0	0.835256	0.393	0.154	0	Neuron	mapk11
0	0.834356	0.351	0.056	0	Neuron	camk2d2
0	0.831461	0.231	0.077	0	Neuron	scrt1a
0	0.825831	0.674	0.411	0	Neuron	myt1a
0	0.825439	0.482	0.316	0	Neuron	ppme1
0	0.824966	0.517	0.329	0	Neuron	fundc1
0	0.823149	0.384	0.099	0	Neuron	cnrip1a
0	0.821562	0.688	0.567	0	Neuron	nfil3-5
0	0.821326	0.227	0.027	0	Neuron	grin1a
0	0.820088	0.335	0.065	0	Neuron	ppp3ca
0	0.819445	0.347	0.079	0	Neuron	sh3gl2a
0	0.818774	0.739	0.653	0	Neuron	midn
0	0.817129	0.237	0.059	0	Neuron	onecutl
0	0.813416	0.327	0.067	0	Neuron	ank3b.1
0	0.811981	0.317	0.059	0	Neuron	adgrb1a
0	0.809259	0.581	0.41	0	Neuron	nkain1
0	0.809006	0.33	0.055	0	Neuron	dnajc6
0	0.805174	0.31	0.052	0	Neuron	sprn
0	0.803308	0.187	0.036	0	Neuron	pcdh7a
0	0.803151	0.303	0.069	0	Neuron	nptnb
0	0.802175	0.6	0.457	0	Neuron	tnip1
0	0.801813	0.463	0.238	0	Neuron	ctnnbip1
0	0.800683	0.484	0.184	0	Neuron	scrt2
0	0.800557	0.189	0.044	0	Neuron	gria1a
0	0.800442	0.19	0.038	0	Neuron	adcyap1r1a.1
0	0.800092	0.346	0.075	0	Neuron	kalrnb
0	0.792577	0.426	0.226	0	Neuron	zgc:100920
0	0.792459	0.309	0.05	0	Neuron	fgf13a
0	0.790559	0.531	0.385	0	Neuron	phf14
0	0.789882	0.659	0.545	0	Neuron	mlf2
0	0.788628	0.212	0.031	0	Neuron	cdk5r2a
0	0.78755	0.405	0.215	0	Neuron	plxna3
0	0.785538	0.697	0.625	0	Neuron	vdac3
0	0.778219	0.321	0.075	0	Neuron	ppp3cb
0	0.77754	0.434	0.26	0	Neuron	camk2g2
0	0.776167	0.3	0.044	0	Neuron	scn8aa
0	0.775624	0.225	0.031	0	Neuron	syngr3b
0	0.770605	0.471	0.275	0	Neuron	coro1cb
0	0.770564	0.301	0.066	0	Neuron	phactr3b
0	0.770372	0.409	0.141	0	Neuron	rab42a
0	0.770265	0.299	0.06	0	Neuron	shisa7b
0	0.769986	0.407	0.145	0	Neuron	gdi1
0	0.769762	0.414	0.181	0	Neuron	stox2a
0	0.764318	0.231	0.037	0	Neuron	slc4a10a
0	0.761943	0.74	0.692	0	Neuron	eif4a1b
0	0.760085	0.303	0.052	0	Neuron	igsf9ba
0	0.758805	0.339	0.07	0	Neuron	jakmip2
0	0.758715	0.155	0.035	0	Neuron	khdrbs2
0	0.758258	0.263	0.041	0	Neuron	si:ch73-119p20.1
0	0.757092	0.463	0.282	0	Neuron	exoc6
0	0.752243	0.343	0.081	0	Neuron	cntnap2b
0	0.750333	0.447	0.291	0	Neuron	clasp2
0	0.749073	0.651	0.563	0	Neuron	kdm4b
0	0.749062	0.334	0.071	0	Neuron	stap2a
0	0.748817	0.831	0.816	0	Neuron	ywhaqb
0	0.748391	0.246	0.036	0	Neuron	gpc1a
0	0.748144	0.434	0.233	0	Neuron	kif5ba.1
0	0.745046	0.335	0.079	0	Neuron	upf3a
0	0.744243	0.242	0.061	0	Neuron	ctnnd2a
0	0.744032	0.319	0.105	0	Neuron	dchs1b
0	0.743849	0.311	0.058	0	Neuron	palm1a
0	0.743595	0.167	0.025	0	Neuron	GRIK2
0	0.741941	0.433	0.182	0	Neuron	2023-09-03
0	0.737172	0.61	0.497	0	Neuron	pdcl
0	0.73406	0.248	0.036	0	Neuron	nlgn3b
0	0.733859	0.357	0.103	0	Neuron	crip2l
0	0.733317	0.487	0.302	0	Neuron	fmnl2b
0	0.732924	0.329	0.065	0	Neuron	fmn2b
0	0.731661	0.455	0.222	0	Neuron	tmed4
0	0.731338	0.327	0.139	0	Neuron	st6gal2a
0	0.726752	0.339	0.088	0	Neuron	fryb
0	0.726438	0.892	0.838	0	Neuron	calr
0	0.724834	0.277	0.047	0	Neuron	syt4
0	0.724054	0.447	0.264	0	Neuron	kifap3a
0	0.718888	0.286	0.122	0	Neuron	ppp1r14ab
0	0.717677	0.197	0.028	0	Neuron	atp2b3b
0	0.716529	0.523	0.335	0	Neuron	dbn1
0	0.716504	0.321	0.055	0	Neuron	snap91b
0	0.714231	0.463	0.296	0	Neuron	tusc3
0	0.712584	0.272	0.045	0	Neuron	hivep3a
0	0.71225	0.337	0.091	0	Neuron	snap91a
0	0.71178	0.245	0.071	0	Neuron	rab6bb
0	0.708379	0.42	0.176	0	Neuron	elovl4a
0	0.708189	0.508	0.314	0	Neuron	cadm3
0	0.708155	0.396	0.173	0	Neuron	flot1a
0	0.704783	0.209	0.021	0	Neuron	slc17a6a
0	0.703758	0.25	0.049	0	Neuron	slc35g2b
0	0.702944	0.237	0.037	0	Neuron	clstn3
0	0.702878	0.312	0.063	0	Neuron	gpr27
0	0.702459	0.873	0.894	0	Neuron	eif1
0	0.701098	0.223	0.05	0	Neuron	map1b
0	0.70089	0.235	0.037	0	Neuron	serpini1
0	0.698246	0.369	0.177	0	Neuron	tcf20
0	0.697929	0.432	0.24	0	Neuron	lin7b
0	0.691675	0.179	0.046	0	Neuron	tubb2
0	0.689613	0.262	0.065	0	Neuron	spock3
0	0.688318	0.353	0.148	0	Neuron	kif3a
0	0.687079	0.293	0.056	0	Neuron	adam23a
0	0.685989	0.76	0.705	0	Neuron	si:dkey-56m19.5
0	0.681945	0.29	0.073	0	Neuron	caly
0	0.67838	0.282	0.081	0	Neuron	jam3a
0	0.677696	0.22	0.037	0	Neuron	l1cama
0	0.677381	0.398	0.174	0	Neuron	fyna
0	0.677289	0.313	0.1	0	Neuron	ccdc50
0	0.67647	0.147	0.035	0	Neuron	rtn4r
0	0.676379	0.448	0.281	0	Neuron	arl8a
0	0.674877	0.379	0.146	0	Neuron	AP3B2
0	0.674035	0.81	0.795	0	Neuron	pbx4
0	0.672713	0.403	0.212	0	Neuron	pank1b
0	0.672093	0.436	0.243	0	Neuron	dpysl5a
0	0.664571	0.366	0.163	0	Neuron	rybpa
0	0.664488	0.274	0.09	0	Neuron	atxn1b
0	0.662603	0.356	0.162	0	Neuron	ttyh3b
0	0.659891	0.283	0.042	0	Neuron	nmnat2
0	0.658541	0.195	0.03	0	Neuron	olfm2a
0	0.656623	0.3	0.071	0	Neuron	si:ch211-244c8.4
2.36228e-307	0.759309	0.568	0.438	5.58703e-303	Neuron	arnt2
6.43527e-305	0.767934	0.443	0.282	1.522e-300	Neuron	man2a2
3.41228e-304	0.701409	0.468	0.315	8.07039e-300	Neuron	slc7a6os
9.57519e-304	0.682186	0.509	0.354	2.26463e-299	Neuron	g3bp2
5.3097e-301	0.689399	0.385	0.217	1.2558e-296	Neuron	map2
1.69178e-299	0.7553	0.567	0.448	4.00123e-295	Neuron	ube2e2
8.45471e-298	0.699083	0.757	0.758	1.99962e-293	Neuron	oaz1a
2.95193e-292	0.973047	0.239	0.092	6.98161e-288	Neuron	slc6a1b
1.57256e-291	0.703345	0.682	0.654	3.71925e-287	Neuron	atp6v0ca
3.23784e-284	2.56237	0.26	0.116	7.65782e-280	Neuron	otpa
2.80749e-281	0.770399	0.445	0.297	6.63999e-277	Neuron	atp1b3a
2.03879e-278	0.702184	0.485	0.348	4.82193e-274	Neuron	scocb
2.96552e-276	0.695048	0.546	0.407	7.01374e-272	Neuron	CABZ01080702.1
2.61537e-275	0.653298	0.456	0.315	6.18562e-271	Neuron	pop7
6.57664e-275	0.694534	0.358	0.201	1.55544e-270	Neuron	purab
1.05535e-273	0.737957	0.459	0.31	2.49602e-269	Neuron	chd6
6.5164e-266	0.737113	0.598	0.489	1.54119e-261	Neuron	rnf44
5.88868e-260	1.24299	0.55	0.42	1.39273e-255	Neuron	id2a
7.34374e-260	0.765644	0.508	0.378	1.73687e-255	Neuron	ndrg2
3.47476e-259	0.705563	0.46	0.322	8.21816e-255	Neuron	pou2f1b
3.00799e-257	0.857431	0.473	0.34	7.1142e-253	Neuron	tpi1b
6.87889e-248	0.713883	0.427	0.29	1.62693e-243	Neuron	arid1b
1.28538e-245	0.974065	0.407	0.256	3.04005e-241	Neuron	ebf3a
4.64996e-242	0.725641	0.505	0.398	1.09976e-237	Neuron	ppp3r1b
3.85888e-239	1.47501	0.13	0.037	9.12664e-235	Neuron	slc6a5
8.89881e-239	0.726136	0.396	0.254	2.10466e-234	Neuron	phc2b
4.18301e-237	0.790352	0.716	0.708	9.89324e-233	Neuron	chd4a
3.84665e-228	0.691801	0.547	0.443	9.09772e-224	Neuron	eif4ebp1
1.03641e-225	0.784576	0.518	0.404	2.45121e-221	Neuron	slc3a2b
1.51887e-224	0.660249	0.695	0.662	3.59229e-220	Neuron	bsg
8.36286e-218	0.84333	0.448	0.326	1.9779e-213	Neuron	klf7b
6.76278e-216	0.884819	0.306	0.175	1.59946e-211	Neuron	mast2
4.24543e-215	0.664427	0.455	0.342	1.00409e-210	Neuron	vapb
1.56279e-213	0.78505	0.564	0.492	3.69616e-209	Neuron	irf2bpl
9.0104e-211	0.727074	0.352	0.216	2.13105e-206	Neuron	eno1a
5.14975e-207	0.777206	0.209	0.089	1.21797e-202	Neuron	gad2
2.12386e-204	0.905775	0.389	0.264	5.02315e-200	Neuron	insig1
1.9915e-203	0.674499	0.606	0.547	4.7101e-199	Neuron	kdm2ba
6.13281e-203	0.712937	0.1	0.025	1.45047e-198	Neuron	cbln1
2.96049e-201	0.784185	0.457	0.338	7.00186e-197	Neuron	aldocb
7.51919e-201	0.963859	0.178	0.072	1.77836e-196	Neuron	barhl2
3.22682e-200	0.673555	0.489	0.394	7.63174e-196	Neuron	nckap1
6.17258e-197	0.678215	0.263	0.14	1.45988e-192	Neuron	lrp8
7.06718e-197	2.00281	0.197	0.087	1.67146e-192	Neuron	otpb
1.03965e-194	0.669285	0.542	0.451	2.45887e-190	Neuron	dnajb11
3.30291e-193	1.23367	0.184	0.079	7.8117e-189	Neuron	pax2a
2.59646e-192	0.832096	0.348	0.23	6.14089e-188	Neuron	calm3a.1
2.73074e-184	2.36232	0.392	0.262	6.45847e-180	Neuron	hsp90aa1.2
3.70198e-183	0.667669	0.544	0.47	8.75556e-179	Neuron	ddx6
5.81455e-173	0.706636	0.331	0.215	1.3752e-168	Neuron	klf7a
3.60944e-171	0.793082	0.254	0.14	8.53668e-167	Neuron	tshz3b
1.06982e-165	0.72789	0.181	0.083	2.53022e-161	Neuron	mcama
2.77689e-159	0.762243	0.524	0.428	6.56763e-155	Neuron	hist2h2l
9.69667e-156	0.79339	0.239	0.134	2.29336e-151	Neuron	zgc:153426
1.98358e-153	1.78234	0.171	0.079	4.69135e-149	Neuron	hsp70.1
1.05568e-147	0.767948	0.194	0.098	2.49679e-143	Neuron	foxp2
1.09718e-142	0.662145	0.275	0.166	2.59495e-138	Neuron	pcdh17
2.7019e-140	0.79429	0.769	0.815	6.39026e-136	Neuron	sox11a
4.14231e-140	1.59804	0.141	0.06	9.79698e-136	Neuron	hsp70l
2.43864e-135	0.744604	0.178	0.09	5.76763e-131	Neuron	lhx2b
1.5492e-128	0.689541	0.378	0.278	3.66401e-124	Neuron	tenm3
7.34137e-126	0.654254	0.386	0.281	1.73631e-121	Neuron	pou3f2b
3.57094e-125	0.704168	0.422	0.351	8.44564e-121	Neuron	oip5-as1
3.30979e-115	1.9303	0.218	0.129	7.82798e-111	Neuron	hsp70.2
4.39592e-115	0.789974	0.499	0.442	1.03968e-110	Neuron	nr2f1a
1.87682e-113	1.89448	0.269	0.173	4.43886e-109	Neuron	hsp70.3
1.48182e-104	0.663055	0.423	0.351	3.50465e-100	Neuron	vat1
2.4896e-100	0.916756	0.132	0.062	5.88816e-96	Neuron	mt2
2.91465e-97	0.664936	0.192	0.113	6.89344e-93	Neuron	irx2a
1.95451e-95	0.978649	0.5	0.489	4.62262e-91	Neuron	meis1b
3.18768e-95	1.1352	0.191	0.36	7.53918e-91	Neuron	tcf7l2
7.51608e-87	1.14018	0.175	0.105	1.77763e-82	Neuron	tfap2a
6.90817e-86	0.665976	0.387	0.329	1.63385e-81	Neuron	jund
2.46774e-82	0.939699	0.595	0.63	5.83645e-78	Neuron	khdrbs1b
1.38467e-81	0.719643	0.17	0.1	3.27489e-77	Neuron	roraa
2.17233e-66	0.986805	0.117	0.064	5.13779e-62	Neuron	tfap2b
2.35052e-65	0.767382	0.299	0.234	5.55922e-61	Neuron	alcama
6.4162e-59	0.726467	0.255	0.194	1.5175e-54	Neuron	bcam
9.3688e-43	1.16082	0.223	0.169	2.21581e-38	Neuron	vim
4.20451e-23	1.12422	0.433	0.463	9.94408e-19	Neuron	rsrp1
1.86857e-20	0.834173	0.223	0.188	4.41935e-16	Neuron	neurod1
2.70801e-11	0.778233	0.101	0.083	6.40472e-07	Neuron	bnc2
1.34572e-09	0.670943	0.425	0.443	3.18275e-05	Neuron	pou3f1
5.03241e-08	1.04922	0.474	0.541	0.00119021	Neuron	jun
9.86347e-07	0.766132	0.409	0.451	0.0233281	Neuron	nr2f2
0	2.51072	0.884	0.176	0	Pharyneal arch	pmp22a
0	1.93639	0.6	0.066	0	Pharyneal arch	twist1a
0	1.92855	0.48	0.065	0	Pharyneal arch	dlx5a
0	1.89122	0.853	0.239	0	Pharyneal arch	krt18a.1
0	1.86321	0.375	0.034	0	Pharyneal arch	dlx3b
0	1.61208	0.283	0.012	0	Pharyneal arch	dlx4a
0	1.54709	0.311	0.024	0	Pharyneal arch	gsc
0	1.49308	0.33	0.028	0	Pharyneal arch	grem2b
0	1.48703	0.756	0.207	0	Pharyneal arch	krt8
0	1.46631	0.795	0.4	0	Pharyneal arch	tpm4a
0	1.46078	0.427	0.076	0	Pharyneal arch	ociad2
0	1.41261	0.577	0.191	0	Pharyneal arch	serpinh1b
0	1.35529	0.578	0.157	0	Pharyneal arch	ahnak
0	1.3399	0.506	0.203	0	Pharyneal arch	nr2f1b
0	1.29077	0.596	0.246	0	Pharyneal arch	arhgef1b
0	1.26711	0.483	0.054	0	Pharyneal arch	foxc1b
0	1.2324	0.765	0.389	0	Pharyneal arch	sparc
0	1.19069	0.303	0.014	0	Pharyneal arch	ccn2b
0	1.1741	0.209	0.019	0	Pharyneal arch	fgfbp2b
0	1.16889	0.471	0.061	0	Pharyneal arch	prrx1a
0	1.15151	0.519	0.085	0	Pharyneal arch	si:dkey-261h17.1
0	1.14916	0.874	0.726	0	Pharyneal arch	zgc:153867
0	1.13074	0.492	0.069	0	Pharyneal arch	pdgfra
0	1.1229	0.553	0.179	0	Pharyneal arch	cdh11
0	1.09716	0.572	0.191	0	Pharyneal arch	flna
0	1.08114	0.384	0.064	0	Pharyneal arch	bhmt
0	1.03695	0.366	0.06	0	Pharyneal arch	si:ch211-161c3.6
0	1.01716	0.576	0.237	0	Pharyneal arch	lsp1a
0	1.00282	0.43	0.078	0	Pharyneal arch	LO018188.1
0	0.995627	0.371	0.078	0	Pharyneal arch	ccn1
0	0.978711	0.365	0.08	0	Pharyneal arch	meis1a
0	0.978252	0.658	0.378	0	Pharyneal arch	cnn2
0	0.976381	0.589	0.355	0	Pharyneal arch	atf5b
0	0.952442	0.446	0.083	0	Pharyneal arch	emp2
0	0.942388	0.502	0.272	0	Pharyneal arch	rgmd
0	0.933123	0.593	0.278	0	Pharyneal arch	fstl1b
0	0.916121	0.408	0.073	0	Pharyneal arch	s100v2
0	0.902956	0.481	0.122	0	Pharyneal arch	mfap2
0	0.896672	0.531	0.123	0	Pharyneal arch	col5a1
0	0.892675	0.261	0.067	0	Pharyneal arch	cxcl14
0	0.87679	0.748	0.539	0	Pharyneal arch	msna
0	0.868894	0.249	0.01	0	Pharyneal arch	dlx4b
0	0.855352	0.361	0.049	0	Pharyneal arch	fibina
0	0.853324	0.318	0.052	0	Pharyneal arch	ccn2a
0	0.843709	0.404	0.047	0	Pharyneal arch	fli1a
0	0.842439	0.405	0.111	0	Pharyneal arch	rbp5
0	0.832596	0.406	0.077	0	Pharyneal arch	sult6b1
0	0.830521	0.505	0.254	0	Pharyneal arch	2023-09-10
0	0.82815	0.379	0.052	0	Pharyneal arch	ms4a17a.9
0	0.820307	0.359	0.063	0	Pharyneal arch	vasna
0	0.816148	0.474	0.209	0	Pharyneal arch	tln1
0	0.797014	0.378	0.064	0	Pharyneal arch	six1a
0	0.792249	0.703	0.451	0	Pharyneal arch	sdc4
0	0.783403	0.357	0.048	0	Pharyneal arch	cd248a
0	0.780879	0.194	0.008	0	Pharyneal arch	barx1
0	0.77349	0.383	0.09	0	Pharyneal arch	actn1
0	0.765052	0.268	0.075	0	Pharyneal arch	foxd1
0	0.758365	0.363	0.058	0	Pharyneal arch	ms4a17a.11
0	0.757402	0.288	0.044	0	Pharyneal arch	rnd3b
0	0.749844	0.504	0.265	0	Pharyneal arch	myl9b
0	0.743322	0.505	0.123	0	Pharyneal arch	col1a2
0	0.741139	0.306	0.063	0	Pharyneal arch	BX088707.3
0	0.739595	0.368	0.125	0	Pharyneal arch	rrbp1b
0	0.736045	0.397	0.156	0	Pharyneal arch	myh9b
0	0.730906	0.428	0.089	0	Pharyneal arch	krt18b
0	0.729618	0.245	0.074	0	Pharyneal arch	emx2
0	0.709968	0.338	0.064	0	Pharyneal arch	si:ch73-86n18.1
0	0.707346	0.187	0.006	0	Pharyneal arch	hand2
0	0.698052	0.403	0.136	0	Pharyneal arch	notch2
0	0.690895	0.377	0.101	0	Pharyneal arch	ahr2
0	0.677359	0.286	0.03	0	Pharyneal arch	vcanb
0	0.676236	0.36	0.051	0	Pharyneal arch	ppfibp1a
0	0.676144	0.307	0.037	0	Pharyneal arch	foxc1a
0	0.674314	0.396	0.055	0	Pharyneal arch	dlx2a
0	0.663897	0.227	0.03	0	Pharyneal arch	prrx1b
0	0.663614	0.344	0.129	0	Pharyneal arch	zgc:162730
0	0.658533	0.415	0.119	0	Pharyneal arch	tmem176
0	0.650154	0.265	0.084	0	Pharyneal arch	hoxa2b
0	0.646651	0.402	0.151	0	Pharyneal arch	myo1b
0	0.638305	0.33	0.085	0	Pharyneal arch	postnb
0	0.636317	0.223	0.029	0	Pharyneal arch	dlx6a
0	0.63568	0.481	0.244	0	Pharyneal arch	slc38a5b
0	0.635598	0.19	0.03	0	Pharyneal arch	sost
0	0.628448	0.337	0.131	0	Pharyneal arch	pcdh18a
0	0.626356	0.385	0.133	0	Pharyneal arch	crtap
0	0.617857	0.338	0.116	0	Pharyneal arch	col12a1a
0	0.614928	0.982	0.904	0	Pharyneal arch	actb1
0	0.612554	0.328	0.116	0	Pharyneal arch	hey1
0	0.608257	0.256	0.023	0	Pharyneal arch	twist1b
0	0.601468	0.364	0.117	0	Pharyneal arch	tns1b
0	0.599669	0.422	0.085	0	Pharyneal arch	col1a1a
0	0.595571	0.317	0.081	0	Pharyneal arch	palld
0	0.595347	0.313	0.056	0	Pharyneal arch	plekhg2
0	0.589631	0.335	0.061	0	Pharyneal arch	rasl11a
0	0.586845	0.343	0.1	0	Pharyneal arch	zfp36l2
0	0.573296	0.293	0.054	0	Pharyneal arch	ednraa
0	0.565136	0.336	0.083	0	Pharyneal arch	plxnb2a
0	0.562067	0.255	0.032	0	Pharyneal arch	si:dkeyp-44a8.4
0	0.550288	0.375	0.151	0	Pharyneal arch	rbms1a
0	0.536474	0.295	0.097	0	Pharyneal arch	bmpr1ba
0	0.535437	0.372	0.137	0	Pharyneal arch	rbms2b
0	0.52911	0.322	0.046	0	Pharyneal arch	colec12
0	0.5263	0.305	0.054	0	Pharyneal arch	tmem119b
0	0.52535	0.366	0.112	0	Pharyneal arch	fkbp9
0	0.520644	0.997	0.982	0	Pharyneal arch	actb2
0	0.519053	0.281	0.035	0	Pharyneal arch	lpar1
0	0.505441	0.255	0.039	0	Pharyneal arch	stard9
0	0.503699	0.28	0.063	0	Pharyneal arch	mmp2
0	0.498516	0.225	0.035	0	Pharyneal arch	amotl2b
0	0.493873	0.288	0.099	0	Pharyneal arch	fzd4
0	0.479179	0.258	0.042	0	Pharyneal arch	fmoda
0	0.471082	0.311	0.086	0	Pharyneal arch	emd
0	0.468248	0.267	0.066	0	Pharyneal arch	tgfbi
0	0.465827	0.998	0.976	0	Pharyneal arch	rpl38
0	0.459271	0.358	0.084	0	Pharyneal arch	col2a1b
0	0.452286	0.998	0.995	0	Pharyneal arch	rps12
0	0.449261	0.241	0.063	0	Pharyneal arch	glipr2l
0	0.446759	0.998	0.99	0	Pharyneal arch	rps29
0	0.442183	0.218	0.03	0	Pharyneal arch	arhgap36
0	0.439757	0.262	0.031	0	Pharyneal arch	rin3
0	0.438372	0.236	0.04	0	Pharyneal arch	BNC1
0	0.435507	0.25	0.073	0	Pharyneal arch	stox1
0	0.431211	0.999	0.989	0	Pharyneal arch	rps3a
0	0.430556	0.225	0.044	0	Pharyneal arch	snai1a
0	0.430066	0.262	0.043	0	Pharyneal arch	phlda3
0	0.42944	0.18	0.037	0	Pharyneal arch	igf2a
0	0.427901	0.234	0.041	0	Pharyneal arch	efemp2a
0	0.426608	0.16	0.026	0	Pharyneal arch	mxra8b
0	0.423328	0.309	0.101	0	Pharyneal arch	pls3
0	0.422381	0.229	0.053	0	Pharyneal arch	dcn
0	0.420869	0.259	0.065	0	Pharyneal arch	tspan4b
0	0.420197	0.237	0.045	0	Pharyneal arch	niban2a
0	0.416111	0.992	0.976	0	Pharyneal arch	rpl3
0	0.415438	0.999	0.992	0	Pharyneal arch	rpl37.1
0	0.412258	0.233	0.034	0	Pharyneal arch	si:ch211-156j16.1
0	0.407906	0.234	0.048	0	Pharyneal arch	pdgfrb
0	0.406349	0.233	0.058	0	Pharyneal arch	cpn1.1
0	0.406349	0.179	0.038	0	Pharyneal arch	sfrp2
0	0.400451	0.999	0.993	0	Pharyneal arch	rps24
0	0.395493	0.251	0.032	0	Pharyneal arch	arpc1b
0	0.392882	0.999	0.999	0	Pharyneal arch	si:dkey-151g10.6
0	0.392212	0.998	0.982	0	Pharyneal arch	rpl10a
0	0.389065	0.192	0.039	0	Pharyneal arch	egfl7
0	0.3859	1	0.994	0	Pharyneal arch	rplp2l
0	0.383462	0.999	0.995	0	Pharyneal arch	rplp0
0	0.383299	0.999	0.988	0	Pharyneal arch	rps11
0	0.382805	0.223	0.044	0	Pharyneal arch	MDFIC
0	0.37773	0.991	0.968	0	Pharyneal arch	rps26
0	0.377494	0.997	0.984	0	Pharyneal arch	rpl12
0	0.376902	0.225	0.054	0	Pharyneal arch	cyp2ad3
0	0.376692	0.996	0.991	0	Pharyneal arch	rpl9
0	0.376013	0.999	0.994	0	Pharyneal arch	rps7
0	0.374279	0.998	0.981	0	Pharyneal arch	rps28
0	0.372677	0.225	0.046	0	Pharyneal arch	marveld1
0	0.37195	0.237	0.066	0	Pharyneal arch	col1a1b
0	0.370845	0.175	0.037	0	Pharyneal arch	kazald2
0	0.370077	0.285	0.064	0	Pharyneal arch	KCTD15
0	0.367138	0.197	0.017	0	Pharyneal arch	MYADM.1
0	0.363371	0.997	0.983	0	Pharyneal arch	rps26l
0	0.361335	0.214	0.032	0	Pharyneal arch	sult1st1
0	0.360822	0.998	0.993	0	Pharyneal arch	rps9
0	0.358854	0.998	0.993	0	Pharyneal arch	rps13
0	0.357756	0.999	0.994	0	Pharyneal arch	rpl7a
0	0.355297	0.238	0.045	0	Pharyneal arch	tnfsf10l
0	0.354738	0.998	0.99	0	Pharyneal arch	rpl18
0	0.354341	0.999	0.994	0	Pharyneal arch	rpl39
0	0.353735	0.998	0.99	0	Pharyneal arch	rpl35a
0	0.350197	0.253	0.066	0	Pharyneal arch	fmnl3
0	0.34996	0.998	0.989	0	Pharyneal arch	faua
0	0.348652	0.24	0.063	0	Pharyneal arch	fgfrl1a
0	0.345636	1	0.998	0	Pharyneal arch	rplp1
0	0.345329	0.244	0.052	0	Pharyneal arch	palm2akap2.1
0	0.342305	0.996	0.99	0	Pharyneal arch	rpl10
0	0.340309	0.999	0.994	0	Pharyneal arch	rpl36a
0	0.338996	0.999	0.989	0	Pharyneal arch	rpl13a
0	0.335449	0.169	0.021	0	Pharyneal arch	vstm4a
0	0.330881	0.217	0.046	0	Pharyneal arch	si:ch1073-291c23.2
0	0.330182	0.152	0.012	0	Pharyneal arch	cpa6
0	0.329675	0.997	0.991	0	Pharyneal arch	rpl24
0	0.329625	0.22	0.048	0	Pharyneal arch	sgms1
0	0.328067	0.212	0.051	0	Pharyneal arch	fkbp7
0	0.324305	0.288	0.098	0	Pharyneal arch	zgc:158343
0	0.320956	0.999	0.994	0	Pharyneal arch	rps14
0	0.31868	0.999	0.993	0	Pharyneal arch	rpl21
0	0.317835	0.186	0.042	0	Pharyneal arch	pmp22b
0	0.314271	0.248	0.068	0	Pharyneal arch	lama4
0	0.312759	0.189	0.028	0	Pharyneal arch	six4a
0	0.311739	0.999	0.993	0	Pharyneal arch	rps10
0	0.309427	0.999	0.996	0	Pharyneal arch	rpl17
0	0.296526	0.197	0.049	0	Pharyneal arch	itga5
0	0.295165	0.216	0.057	0	Pharyneal arch	CABZ01061591.1
0	0.291769	0.256	0.077	0	Pharyneal arch	six1b
0	0.285629	0.182	0.027	0	Pharyneal arch	tmem204
0	0.28533	0.211	0.053	0	Pharyneal arch	iqgap1
0	0.284283	0.209	0.054	0	Pharyneal arch	zcchc24
0	0.283047	0.163	0.032	0	Pharyneal arch	ntd5
0	0.280432	0.256	0.037	0	Pharyneal arch	dlx1a
0	0.280041	0.179	0.026	0	Pharyneal arch	cspg4
0	0.2749	0.144	0.022	0	Pharyneal arch	phldb2b
0	0.274576	0.183	0.042	0	Pharyneal arch	CPNE8
0	0.268888	0.152	0.03	0	Pharyneal arch	pdgfc
0	0.266246	0.161	0.015	0	Pharyneal arch	phldb2a
6.30728e-308	0.352028	0.998	0.989	1.49173e-303	Pharyneal arch	rpl7
5.88378e-305	0.419891	0.116	0.018	1.39157e-300	Pharyneal arch	twist2
8.42013e-303	0.411588	0.208	0.055	1.99144e-298	Pharyneal arch	six2a
2.78462e-302	0.314222	0.997	0.988	6.58591e-298	Pharyneal arch	rpl35
1.33266e-300	0.314953	0.197	0.05	3.15186e-296	Pharyneal arch	mmp14a
1.69316e-299	0.618403	0.312	0.118	4.00449e-295	Pharyneal arch	igf2b
6.63498e-299	0.322278	0.998	0.988	1.56924e-294	Pharyneal arch	rps21
9.38373e-298	0.332586	0.242	0.075	2.21935e-293	Pharyneal arch	smco4
1.03862e-297	0.323237	0.998	0.994	2.45644e-293	Pharyneal arch	rpl8
1.09739e-297	0.337156	0.999	0.986	2.59544e-293	Pharyneal arch	zgc:171772
2.48894e-297	0.635397	0.451	0.233	5.88658e-293	Pharyneal arch	stom
7.88878e-297	0.330654	0.997	0.99	1.86578e-292	Pharyneal arch	rps15a
2.07725e-294	0.687263	0.473	0.246	4.91291e-290	Pharyneal arch	pleca
2.78907e-293	0.503286	0.349	0.148	6.59643e-289	Pharyneal arch	si:dkey-222f8.3
1.14459e-292	0.286042	0.146	0.03	2.70706e-288	Pharyneal arch	csf1a
2.25009e-290	0.301139	0.241	0.075	5.32169e-286	Pharyneal arch	plod1a
2.39423e-288	0.355628	0.176	0.043	5.66259e-284	Pharyneal arch	nog2
6.46556e-286	0.417292	0.967	0.921	1.52917e-281	Pharyneal arch	rpl22l1
8.1867e-286	0.340837	0.989	0.972	1.93624e-281	Pharyneal arch	rpl34
2.08933e-285	0.285371	0.999	0.994	4.94148e-281	Pharyneal arch	rpl31
2.32502e-283	0.394104	0.189	0.049	5.49891e-279	Pharyneal arch	inka1a
6.08574e-282	0.363627	0.982	0.947	1.43934e-277	Pharyneal arch	rps17
6.98487e-282	0.259639	0.136	0.027	1.65199e-277	Pharyneal arch	serpinf1
3.91391e-281	0.31079	0.997	0.992	9.2568e-277	Pharyneal arch	rpl18a
1.36739e-280	0.341456	0.982	0.962	3.23401e-276	Pharyneal arch	rplp2
2.43066e-278	0.45264	0.332	0.139	5.74874e-274	Pharyneal arch	creb3l2
4.57379e-277	0.324005	0.999	0.992	1.08175e-272	Pharyneal arch	rps8a
5.90473e-277	0.284894	0.998	0.993	1.39653e-272	Pharyneal arch	rps25
3.5989e-276	0.291026	0.999	0.992	8.51175e-272	Pharyneal arch	rpl19
1.35767e-272	0.286324	0.999	0.993	3.21102e-268	Pharyneal arch	rpl32
7.38789e-271	0.277003	0.998	0.992	1.74731e-266	Pharyneal arch	rps27.1
3.0405e-269	0.412898	0.947	0.913	7.1911e-265	Pharyneal arch	rpl5b
3.07156e-269	0.688843	0.648	0.483	7.26455e-265	Pharyneal arch	tpm3
7.63812e-268	0.30342	0.997	0.986	1.80649e-263	Pharyneal arch	uba52
1.30691e-267	0.493471	0.316	0.13	3.09097e-263	Pharyneal arch	nid2a
4.7097e-267	0.312282	0.997	0.985	1.11389e-262	Pharyneal arch	rpl36
4.66181e-265	0.63146	0.446	0.241	1.10257e-260	Pharyneal arch	flot1b
6.10177e-264	0.41551	0.291	0.112	1.44313e-259	Pharyneal arch	mmp14b
1.33022e-261	0.312869	0.998	0.987	3.14611e-257	Pharyneal arch	rpl11
1.37215e-261	0.279702	0.999	0.991	3.24526e-257	Pharyneal arch	rpl14
4.08152e-258	0.285551	0.999	0.994	9.65319e-254	Pharyneal arch	rps5
2.23743e-256	0.516711	0.348	0.159	5.29174e-252	Pharyneal arch	chp2
3.26557e-256	0.326625	0.239	0.081	7.72339e-252	Pharyneal arch	fzd2
5.85076e-255	0.685038	0.491	0.301	1.38376e-250	Pharyneal arch	ptbp1b
3.18824e-254	0.380923	0.141	0.031	7.54051e-250	Pharyneal arch	rbp4
4.51427e-252	0.346964	0.225	0.074	1.06767e-247	Pharyneal arch	sox9a
8.28878e-252	0.258944	0.184	0.051	1.96038e-247	Pharyneal arch	bmp5
2.73091e-251	0.318784	0.245	0.088	6.45889e-247	Pharyneal arch	cyyr1
3.30352e-251	0.327394	0.278	0.102	7.81316e-247	Pharyneal arch	anxa4
3.34153e-251	0.680993	0.705	0.543	7.90306e-247	Pharyneal arch	tcf12
3.64119e-251	0.446911	0.25	0.086	8.61177e-247	Pharyneal arch	selenop
1.61401e-250	0.268238	0.999	0.998	3.81729e-246	Pharyneal arch	rps23
2.46012e-250	0.291223	0.22	0.07	5.81842e-246	Pharyneal arch	sept9a
3.42743e-250	0.299705	0.999	0.994	8.1062e-246	Pharyneal arch	rpl23
4.22842e-249	0.636039	0.74	0.662	1.00006e-244	Pharyneal arch	myl12.1
1.0412e-248	0.363573	0.253	0.091	2.46254e-244	Pharyneal arch	metrnla
7.52597e-248	0.446293	0.948	0.922	1.77997e-243	Pharyneal arch	sec61g
3.45926e-247	0.273094	0.998	0.994	8.18149e-243	Pharyneal arch	rpl28
1.48728e-246	0.300538	0.293	0.116	3.51757e-242	Pharyneal arch	si:dkey-16p21.8
6.36835e-246	0.507015	0.268	0.104	1.50618e-241	Pharyneal arch	pcbd1
8.20347e-246	0.295039	0.995	0.982	1.9402e-241	Pharyneal arch	rpl22
3.75353e-245	0.273839	0.18	0.051	8.87748e-241	Pharyneal arch	kcnk5b
3.01035e-244	0.465646	0.325	0.142	7.11978e-240	Pharyneal arch	ckap4
4.89027e-243	0.30005	0.995	0.989	1.1566e-238	Pharyneal arch	rps4x
6.1032e-243	0.352392	0.986	0.968	1.44347e-238	Pharyneal arch	eef1b2
1.02328e-242	0.30926	0.279	0.107	2.42017e-238	Pharyneal arch	cyfip1
2.94874e-242	0.27464	0.997	0.99	6.97406e-238	Pharyneal arch	rps16
6.13533e-239	0.506621	0.357	0.169	1.45107e-234	Pharyneal arch	pdlim1
3.70287e-238	0.59364	0.24	0.085	8.75766e-234	Pharyneal arch	igfbp5b
7.71032e-235	0.274646	0.267	0.099	1.82357e-230	Pharyneal arch	kank2
2.05851e-233	0.273174	0.997	0.991	4.86858e-229	Pharyneal arch	RPS17
3.12145e-231	0.282586	0.997	0.987	7.38254e-227	Pharyneal arch	rpl27
1.20583e-229	0.350695	0.237	0.085	2.8519e-225	Pharyneal arch	gstt1b
4.8555e-229	0.312353	0.999	0.991	1.14837e-224	Pharyneal arch	rps2
4.90353e-229	0.263989	0.22	0.074	1.15973e-224	Pharyneal arch	sh3bp5a
1.39672e-227	0.274595	0.998	0.99	3.30338e-223	Pharyneal arch	rps15
7.75387e-227	0.38522	0.32	0.145	1.83387e-222	Pharyneal arch	wasf2
1.74329e-222	0.591849	0.508	0.317	4.12305e-218	Pharyneal arch	plscr3b
4.27851e-219	0.467931	0.313	0.139	1.01191e-214	Pharyneal arch	cebpb
5.53921e-219	0.265728	0.999	0.996	1.31008e-214	Pharyneal arch	rpl13
1.92197e-215	0.32238	0.985	0.965	4.54565e-211	Pharyneal arch	nme2b.1
2.17044e-215	0.302178	0.994	0.977	5.1333e-211	Pharyneal arch	rpl23a
7.30075e-215	0.449826	0.317	0.147	1.7267e-210	Pharyneal arch	nr2f5
1.35462e-214	0.802127	0.448	0.241	3.20381e-210	Pharyneal arch	her6
4.50716e-213	0.280387	0.998	0.982	1.06599e-208	Pharyneal arch	rpl30
1.98948e-212	0.268539	0.998	0.994	4.70531e-208	Pharyneal arch	rpsa
3.30701e-211	0.258893	0.999	0.996	7.82142e-207	Pharyneal arch	rps19
1.97339e-210	0.432101	0.316	0.144	4.66726e-206	Pharyneal arch	hmga2
6.36985e-210	0.355872	0.959	0.933	1.50653e-205	Pharyneal arch	rpl5a
1.02832e-209	0.814782	0.53	0.364	2.43208e-205	Pharyneal arch	2023-09-15
1.06118e-209	0.334531	0.344	0.162	2.50981e-205	Pharyneal arch	anxa11b
2.06826e-209	0.542761	0.417	0.236	4.89163e-205	Pharyneal arch	tmem263
3.72335e-209	0.363215	0.296	0.128	8.80609e-205	Pharyneal arch	gstt1a
6.63232e-207	0.353129	0.266	0.112	1.56861e-202	Pharyneal arch	cast
1.50623e-206	0.288254	0.12	0.028	3.56239e-202	Pharyneal arch	cebpa
1.04252e-205	0.316426	0.131	0.032	2.46567e-201	Pharyneal arch	hsd11b2
5.8535e-205	0.688931	0.675	0.52	1.38441e-200	Pharyneal arch	p4hb
2.76262e-204	0.417524	0.351	0.176	6.53386e-200	Pharyneal arch	cdc42ep5
2.111e-203	0.275309	0.147	0.04	4.99272e-199	Pharyneal arch	lrrc17
5.25673e-202	0.432526	0.321	0.152	1.24327e-197	Pharyneal arch	fzd7b
2.08519e-200	0.514402	0.425	0.246	4.93169e-196	Pharyneal arch	si:dkey-6n21.12
4.55881e-200	0.462782	0.42	0.221	1.0782e-195	Pharyneal arch	si:ch211-286o17.1
7.12169e-198	0.408734	0.682	0.507	1.68435e-193	Pharyneal arch	jun
3.60189e-197	0.258939	0.999	0.994	8.51884e-193	Pharyneal arch	rps27a
2.41247e-195	0.582116	0.529	0.361	5.70573e-191	Pharyneal arch	irf2bp2b
1.42894e-194	0.318408	0.256	0.106	3.3796e-190	Pharyneal arch	anxa11a
9.47552e-194	0.490177	0.892	0.842	2.24105e-189	Pharyneal arch	xbp1
1.35491e-191	0.394064	0.143	0.041	3.2045e-187	Pharyneal arch	serpine1
1.63403e-191	0.290045	0.219	0.083	3.86463e-187	Pharyneal arch	lpp
3.62062e-190	0.312488	0.256	0.105	8.56313e-186	Pharyneal arch	sulf1
6.35082e-189	0.632798	0.592	0.404	1.50203e-184	Pharyneal arch	boc
4.73127e-187	0.281893	0.99	0.979	1.11899e-182	Pharyneal arch	rps6
7.5194e-187	0.277155	0.997	0.985	1.77841e-182	Pharyneal arch	rpl15
9.60496e-186	0.306287	0.243	0.101	2.27167e-181	Pharyneal arch	tram2
3.84691e-184	0.383633	0.354	0.175	9.09833e-180	Pharyneal arch	lmo4b
1.01768e-183	0.305926	0.194	0.068	2.40691e-179	Pharyneal arch	col11a1b
5.78342e-183	0.548975	0.462	0.29	1.36784e-178	Pharyneal arch	asph
1.54565e-178	0.489215	0.391	0.215	3.65562e-174	Pharyneal arch	gas1a
2.5741e-175	0.403427	0.981	0.958	6.08801e-171	Pharyneal arch	hspa5
1.51676e-173	0.550437	0.42	0.26	3.58729e-169	Pharyneal arch	sept8a
1.587e-168	0.596893	0.46	0.293	3.7534e-164	Pharyneal arch	rpl26
4.07025e-164	0.359103	0.134	0.04	9.62656e-160	Pharyneal arch	apela
2.76438e-163	0.497328	0.825	0.803	6.53804e-159	Pharyneal arch	ssr3
1.25625e-160	0.521906	0.641	0.523	2.97117e-156	Pharyneal arch	eef1da
1.44159e-159	0.311701	0.267	0.124	3.40951e-155	Pharyneal arch	arhgap42a
4.07883e-157	0.304386	0.339	0.179	9.64683e-153	Pharyneal arch	capns1a
7.70675e-157	0.305428	0.279	0.132	1.82272e-152	Pharyneal arch	sh3pxd2b
2.61105e-156	0.328988	0.284	0.139	6.17538e-152	Pharyneal arch	lmo4a
1.67061e-155	0.312231	0.325	0.169	3.95115e-151	Pharyneal arch	magt1
4.07698e-153	0.269747	0.29	0.142	9.64246e-149	Pharyneal arch	rhoca
4.53056e-153	0.328624	0.21	0.087	1.07152e-148	Pharyneal arch	tsc22d3
2.51874e-151	0.55927	0.498	0.35	5.95707e-147	Pharyneal arch	clic4
8.25198e-150	0.406733	0.341	0.189	1.95168e-145	Pharyneal arch	sdc2
1.44812e-148	0.32231	0.242	0.11	3.42494e-144	Pharyneal arch	jag1b
1.3537e-147	0.437624	0.739	0.652	3.20163e-143	Pharyneal arch	ctsla
1.49025e-146	0.404673	0.284	0.145	3.52458e-142	Pharyneal arch	fndc3ba
8.28642e-145	0.54552	0.619	0.481	1.95982e-140	Pharyneal arch	calua
1.116e-144	0.388157	0.389	0.235	2.63945e-140	Pharyneal arch	2023-09-02
1.24396e-143	0.389962	0.317	0.168	2.94208e-139	Pharyneal arch	zfp36l1b
5.34878e-143	0.558476	0.516	0.356	1.26504e-138	Pharyneal arch	hapln1a
6.42924e-143	0.393232	0.828	0.764	1.52058e-138	Pharyneal arch	TXN
1.70551e-141	0.366688	0.848	0.834	4.03371e-137	Pharyneal arch	eif5a
1.7214e-141	0.540555	0.432	0.272	4.07128e-137	Pharyneal arch	id3
5.98303e-141	0.255122	0.988	0.96	1.41505e-136	Pharyneal arch	rpl29
4.20428e-139	0.351047	0.298	0.157	9.94354e-135	Pharyneal arch	cdon
7.00334e-139	0.483286	0.49	0.334	1.65636e-134	Pharyneal arch	fzd7a
2.92856e-137	0.40491	0.36	0.212	6.92634e-133	Pharyneal arch	ptk7a
2.93766e-137	0.380764	0.8	0.793	6.94785e-133	Pharyneal arch	serf2
3.28961e-137	0.286547	0.273	0.139	7.78027e-133	Pharyneal arch	sntb2
1.04688e-136	0.471374	0.384	0.235	2.47598e-132	Pharyneal arch	mxd4
1.47606e-135	0.427049	0.427	0.269	3.49102e-131	Pharyneal arch	yap1
2.50413e-135	0.58029	0.305	0.164	5.92251e-131	Pharyneal arch	cxcl12a
3.02984e-134	0.374712	0.711	0.563	7.16587e-130	Pharyneal arch	foxp4
1.70305e-133	0.436215	0.696	0.583	4.02787e-129	Pharyneal arch	ahcy
5.09586e-131	0.263379	0.172	0.068	1.20522e-126	Pharyneal arch	apln
1.54155e-130	0.446617	0.309	0.172	3.64591e-126	Pharyneal arch	mcl1b
4.33536e-130	0.321531	0.316	0.175	1.02536e-125	Pharyneal arch	cd151l
2.99364e-129	0.285137	0.222	0.103	7.08025e-125	Pharyneal arch	pdcd6
4.87078e-129	0.458905	0.217	0.102	1.15199e-124	Pharyneal arch	pbxip1a
3.77412e-128	0.446117	0.378	0.223	8.92617e-124	Pharyneal arch	tnc
4.33798e-128	0.444315	0.19	0.083	1.02598e-123	Pharyneal arch	isg15
9.88427e-128	0.364518	0.574	0.412	2.33773e-123	Pharyneal arch	cnn3a
4.95353e-126	0.322867	0.424	0.27	1.17156e-121	Pharyneal arch	cd63
3.7681e-125	0.293429	0.124	0.042	8.91192e-121	Pharyneal arch	meox1
7.72642e-125	0.439436	0.791	0.77	1.82738e-120	Pharyneal arch	ssr2
1.33373e-122	0.472604	0.588	0.428	3.15439e-118	Pharyneal arch	si:dkey-108k21.10
4.68534e-122	0.409234	0.343	0.208	1.10813e-117	Pharyneal arch	TMEM263
2.06106e-121	0.261275	0.228	0.111	4.8746e-117	Pharyneal arch	luzp1
3.81069e-121	0.603063	0.557	0.448	9.01266e-117	Pharyneal arch	lrrc59
6.28343e-120	0.534425	0.492	0.375	1.48609e-115	Pharyneal arch	ptbp1a
2.64118e-118	0.303151	0.827	0.834	6.24664e-114	Pharyneal arch	eef1db
2.02321e-117	0.327791	0.852	0.846	4.78509e-113	Pharyneal arch	nsa2
2.38326e-117	0.321014	0.301	0.172	5.63665e-113	Pharyneal arch	erf
5.53619e-117	0.290234	0.29	0.16	1.30936e-112	Pharyneal arch	prkab1b
1.43475e-112	0.274061	0.296	0.165	3.39332e-108	Pharyneal arch	zgc:100829
5.32676e-112	0.528851	0.637	0.557	1.25983e-107	Pharyneal arch	si:ch211-15b10.6
9.32406e-111	0.250248	0.233	0.116	2.20523e-106	Pharyneal arch	antxr1c
3.06043e-110	0.347401	0.756	0.621	7.23823e-106	Pharyneal arch	h1-0
3.99993e-110	0.31073	0.237	0.123	9.46024e-106	Pharyneal arch	ccdc187
5.98409e-110	0.491241	0.613	0.464	1.4153e-105	Pharyneal arch	tuba8l
6.02696e-109	0.458737	0.623	0.566	1.42544e-104	Pharyneal arch	ak2
4.46532e-108	0.338341	0.138	0.055	1.05609e-103	Pharyneal arch	thbs1b
6.23493e-108	0.48094	0.766	0.729	1.47462e-103	Pharyneal arch	sec61a1
1.61438e-107	0.395547	0.35	0.216	3.81817e-103	Pharyneal arch	sall4
1.19348e-106	0.317192	0.117	0.041	2.82271e-102	Pharyneal arch	col9a2
2.14761e-105	0.295149	0.221	0.111	5.07931e-101	Pharyneal arch	si:dkey-40c11.2
1.65338e-104	0.409783	0.452	0.321	3.91042e-100	Pharyneal arch	tcf7l1a
2.21864e-102	0.373123	0.344	0.222	5.2473e-98	Pharyneal arch	ilk
6.46087e-102	0.351459	0.37	0.24	1.52806e-97	Pharyneal arch	gnai2a
1.16528e-101	0.366629	0.329	0.206	2.75601e-97	Pharyneal arch	yif1a
8.56055e-101	0.437241	0.527	0.418	2.02466e-96	Pharyneal arch	vamp3
2.46345e-100	0.367352	0.323	0.2	5.8263e-96	Pharyneal arch	plod3
2.71724e-100	0.437909	0.496	0.383	6.42655e-96	Pharyneal arch	rac1a
3.798e-99	0.378749	0.431	0.303	8.98265e-95	Pharyneal arch	pgrmc1
1.89523e-97	0.380212	0.387	0.267	4.48241e-93	Pharyneal arch	lims1
6.07281e-97	0.264956	0.373	0.235	1.43628e-92	Pharyneal arch	mbnl2
6.11337e-97	0.262748	0.876	0.871	1.44587e-92	Pharyneal arch	eif3f
1.4264e-94	0.495988	0.648	0.593	3.37358e-90	Pharyneal arch	serp1
5.87755e-94	0.310737	0.126	0.05	1.3901e-89	Pharyneal arch	matn4
1.00344e-93	0.302528	0.302	0.185	2.37324e-89	Pharyneal arch	napab
1.43297e-92	0.484625	0.789	0.72	3.38911e-88	Pharyneal arch	histh1l
5.91303e-92	0.264732	0.272	0.158	1.39849e-87	Pharyneal arch	gpx8
5.14927e-91	0.382574	0.205	0.108	1.21785e-86	Pharyneal arch	ackr3b
2.34344e-90	0.442152	0.667	0.587	5.54247e-86	Pharyneal arch	ccng1
1.92088e-89	0.340161	0.382	0.255	4.54308e-85	Pharyneal arch	ctdspla
8.92749e-89	0.530426	0.552	0.468	2.11144e-84	Pharyneal arch	tram1
1.69669e-88	0.315792	0.354	0.232	4.01283e-84	Pharyneal arch	zgc:110339
3.67899e-88	0.414154	0.676	0.645	8.70118e-84	Pharyneal arch	adh5
4.41002e-88	0.37178	0.608	0.532	1.04301e-83	Pharyneal arch	qkia
1.34683e-87	0.41427	0.371	0.251	3.1854e-83	Pharyneal arch	ppt1
4.75311e-87	0.577404	0.451	0.323	1.12416e-82	Pharyneal arch	her9
5.79123e-87	0.286094	0.393	0.26	1.36968e-82	Pharyneal arch	rarga
1.03538e-86	0.257395	0.917	0.847	2.44878e-82	Pharyneal arch	si:ch73-281n10.2
3.7597e-83	0.328876	0.68	0.595	8.89207e-79	Pharyneal arch	cd81a
8.77251e-82	0.418879	0.488	0.379	2.07479e-77	Pharyneal arch	aldh9a1a.1
5.97896e-81	0.43719	0.614	0.556	1.41408e-76	Pharyneal arch	ctdsp2
1.40796e-78	0.298979	0.806	0.804	3.32997e-74	Pharyneal arch	ssr4
1.41834e-78	0.415717	0.571	0.498	3.35452e-74	Pharyneal arch	lasp1
3.33073e-78	0.290789	0.798	0.81	7.87752e-74	Pharyneal arch	mibp2
8.441e-78	0.392593	0.655	0.639	1.99638e-73	Pharyneal arch	edf1
4.30428e-77	0.270492	0.296	0.187	1.01801e-72	Pharyneal arch	ddah2
3.78216e-76	0.28309	0.271	0.167	8.94518e-72	Pharyneal arch	lhfpl2a
6.21385e-76	0.33335	0.366	0.258	1.46964e-71	Pharyneal arch	bzw1b
7.10018e-76	0.363833	0.448	0.332	1.67926e-71	Pharyneal arch	nupr1b
4.44204e-75	0.29084	0.666	0.569	1.05059e-70	Pharyneal arch	klf6a
6.51809e-74	0.266528	0.346	0.233	1.54159e-69	Pharyneal arch	kirrel1a
2.69557e-73	0.346625	0.425	0.32	6.3753e-69	Pharyneal arch	aip
2.51716e-71	0.348494	0.517	0.405	5.95333e-67	Pharyneal arch	gadd45ba
4.10438e-71	0.71876	0.372	0.264	9.70728e-67	Pharyneal arch	h1-10
2.93493e-70	0.265913	0.459	0.329	6.9414e-66	Pharyneal arch	si:dkey-7j14.6
4.93242e-70	0.278152	0.835	0.839	1.16657e-65	Pharyneal arch	sec61b
1.51254e-69	0.420697	0.606	0.551	3.5773e-65	Pharyneal arch	reep5
3.21856e-69	0.41024	0.581	0.527	7.61221e-65	Pharyneal arch	hdlbpa
1.60671e-66	0.334588	0.336	0.231	3.80002e-62	Pharyneal arch	rrbp1a
1.19268e-65	0.255572	0.298	0.194	2.82081e-61	Pharyneal arch	znf503
1.57323e-63	0.250456	0.911	0.872	3.72086e-59	Pharyneal arch	hsp90b1
1.73154e-62	0.299982	0.338	0.24	4.09527e-58	Pharyneal arch	mkrn4
4.21145e-62	0.377329	0.432	0.345	9.96051e-58	Pharyneal arch	clint1a
1.04217e-61	0.274633	0.173	0.097	2.46484e-57	Pharyneal arch	sfrp1a
2.11468e-57	0.313281	0.462	0.353	5.00143e-53	Pharyneal arch	hist1h2a3.1
6.26368e-57	0.272404	0.256	0.167	1.48142e-52	Pharyneal arch	brf1a
6.88389e-57	0.254088	0.231	0.147	1.62811e-52	Pharyneal arch	gorab
8.26279e-57	0.260542	0.206	0.125	1.95423e-52	Pharyneal arch	nfe2l2b
1.97465e-56	0.270322	0.355	0.259	4.67024e-52	Pharyneal arch	dvl2
5.98905e-56	0.273113	0.362	0.268	1.41647e-51	Pharyneal arch	arid3b
1.21087e-54	0.358359	0.626	0.607	2.86384e-50	Pharyneal arch	SERP1
2.18865e-54	0.272579	0.185	0.111	5.17639e-50	Pharyneal arch	irf7
2.34619e-50	0.335339	0.568	0.528	5.54899e-46	Pharyneal arch	arpc4l
6.94287e-50	0.29153	0.433	0.336	1.64206e-45	Pharyneal arch	si:dkey-261m9.12
4.17486e-49	0.353556	0.423	0.331	9.87396e-45	Pharyneal arch	si:ch1073-153i20.4
2.59473e-48	0.340494	0.609	0.554	6.1368e-44	Pharyneal arch	tcf3b
1.33149e-45	0.411543	0.488	0.427	3.14911e-41	Pharyneal arch	sept7a
3.20499e-45	0.3304	0.627	0.593	7.58012e-41	Pharyneal arch	igf2bp3
4.73216e-45	0.30889	0.441	0.36	1.1192e-40	Pharyneal arch	add3a
5.92419e-45	0.292951	0.438	0.35	1.40113e-40	Pharyneal arch	si:ch211-113a14.19.2
7.76555e-44	0.367481	0.403	0.32	1.83663e-39	Pharyneal arch	zgc:113983
2.1389e-43	0.273015	0.719	0.748	5.05871e-39	Pharyneal arch	tmem258
2.28553e-43	0.270808	0.291	0.206	5.4055e-39	Pharyneal arch	znf395b
3.26315e-43	0.278831	0.367	0.283	7.71768e-39	Pharyneal arch	triqk
1.40786e-42	0.264934	0.356	0.274	3.32973e-38	Pharyneal arch	carhsp1
1.43758e-41	0.303871	0.535	0.496	3.40002e-37	Pharyneal arch	gng5
1.2626e-39	0.287515	0.473	0.396	2.98618e-35	Pharyneal arch	txnipa
1.93546e-39	0.334982	0.538	0.492	4.57755e-35	Pharyneal arch	bnip4
4.53812e-39	0.440501	0.566	0.545	1.07331e-34	Pharyneal arch	trib3
8.06049e-39	0.31654	0.17	0.111	1.90639e-34	Pharyneal arch	crip2
8.15395e-37	0.295105	0.395	0.318	1.92849e-32	Pharyneal arch	hist2h3c
1.58581e-35	0.284886	0.534	0.473	3.7506e-31	Pharyneal arch	dap1b
1.67486e-34	0.260875	0.468	0.397	3.96121e-30	Pharyneal arch	nutf2l
1.79384e-34	0.330311	0.304	0.235	4.2426e-30	Pharyneal arch	CR762436.2
3.62892e-34	0.330294	0.348	0.281	8.58276e-30	Pharyneal arch	si:ch73-368j24.11
6.31626e-34	0.291889	0.309	0.242	1.49386e-29	Pharyneal arch	rhbdd1
1.65854e-33	0.26273	0.637	0.635	3.92262e-29	Pharyneal arch	capza1b
8.16992e-32	0.334057	0.35	0.284	1.93227e-27	Pharyneal arch	si:ch73-36p18.1
1.37306e-31	0.27719	0.446	0.384	3.24742e-27	Pharyneal arch	jpt2
2.79144e-31	0.270471	0.432	0.365	6.60204e-27	Pharyneal arch	hist1h4l.10
3.20709e-31	0.29647	0.32	0.253	7.58508e-27	Pharyneal arch	si:ch73-335l21.4
5.33585e-31	0.362303	0.47	0.419	1.26198e-26	Pharyneal arch	tp53
5.72758e-30	0.343138	0.591	0.578	1.35463e-25	Pharyneal arch	rhoab
9.56053e-30	0.286416	0.597	0.584	2.26116e-25	Pharyneal arch	cope
1.0611e-29	0.256648	0.38	0.314	2.5096e-25	Pharyneal arch	vgll4b
1.48483e-29	0.301492	0.463	0.414	3.51177e-25	Pharyneal arch	si:dkey-33c12.4
3.4019e-25	0.27342	0.418	0.37	8.04583e-21	Pharyneal arch	dnajc1
1.87713e-24	0.302177	0.393	0.356	4.43961e-20	Pharyneal arch	eif2b2
5.78598e-24	0.268859	0.344	0.288	1.36844e-19	Pharyneal arch	sil1
2.55002e-22	0.303599	0.478	0.45	6.03105e-18	Pharyneal arch	ostc
7.02658e-21	0.26575	0.301	0.251	1.66186e-16	Pharyneal arch	si:dkey-23a13.17
5.95527e-20	0.289387	0.444	0.401	1.40848e-15	Pharyneal arch	rps27l
7.72105e-20	0.274694	0.258	0.212	1.82611e-15	Pharyneal arch	si:ch1073-159d7.7
9.50973e-19	0.25098	0.288	0.244	2.24915e-14	Pharyneal arch	fam210aa
1.81701e-18	0.298589	0.494	0.469	4.2974e-14	Pharyneal arch	dynlt3
1.17258e-17	0.335005	0.481	0.472	2.77328e-13	Pharyneal arch	chchd2
5.13079e-17	0.299353	0.219	0.178	1.21348e-12	Pharyneal arch	gmnn
7.12691e-15	0.262446	0.5	0.49	1.68559e-10	Pharyneal arch	krtcap2
4.87282e-13	0.264763	0.456	0.445	1.15247e-08	Pharyneal arch	gtpbp1
2.06259e-10	0.257683	0.274	0.243	4.87823e-06	Pharyneal arch	galnt7
6.051e-09	0.364379	0.982	0.964	0.000143112	Progenitors	CT027638.1
3.36946e-45	0.486087	0.162	0.109	7.9691e-41	Progenitors	hes2.2
3.12891e-46	0.31006	0.321	0.255	7.40019e-42	Progenitors	nr2f6b
1.71082e-51	0.291152	0.261	0.189	4.04626e-47	Progenitors	zgc:110540
7.61216e-59	0.300762	0.239	0.168	1.80035e-54	Progenitors	plk3
8.77276e-67	0.461949	0.241	0.165	2.07485e-62	Progenitors	CU467822.2
3.19304e-67	0.421541	0.435	0.341	7.55187e-63	Progenitors	insm1a
1.16645e-77	0.309658	0.768	0.677	2.75876e-73	Progenitors	atf3
2.6218e-83	0.346281	0.317	0.218	6.20082e-79	Progenitors	insm1b
4.21476e-91	0.340645	0.577	0.473	9.96833e-87	Progenitors	mxd3
1.41298e-96	0.267664	0.298	0.197	3.34183e-92	Progenitors	numa1
1.52923e-98	0.295668	0.426	0.311	3.61679e-94	Progenitors	jak1
4.17202e-99	0.390762	0.486	0.378	9.86724e-95	Progenitors	elmsan1b
5.36516e-100	0.267646	0.659	0.555	1.26891e-95	Progenitors	brd3a
4.68831e-101	0.283684	0.544	0.42	1.10883e-96	Progenitors	nucks1b
9.3704e-103	0.553756	0.232	0.14	2.21619e-98	Progenitors	fstl1a
1.26477e-104	0.296512	0.723	0.632	2.99131e-100	Progenitors	sub1a
1.25653e-107	0.268496	0.265	0.167	2.97183e-103	Progenitors	anln
6.10243e-108	0.312626	0.435	0.309	1.44329e-103	Progenitors	rbpjb
7.38793e-109	0.26967	0.311	0.201	1.74732e-104	Progenitors	atad2
6.94105e-110	0.298126	0.707	0.61	1.64163e-105	Progenitors	snrpe
2.37496e-110	0.273211	0.31	0.202	5.61701e-106	Progenitors	cdca8
7.93446e-111	0.603818	0.998	0.993	1.87658e-106	Progenitors	zgc:158463
5.94268e-111	0.417664	0.277	0.174	1.4055e-106	Progenitors	kpna2
1.05279e-114	0.270208	0.233	0.136	2.48997e-110	Progenitors	kmt5ab
6.94882e-116	0.290601	0.317	0.206	1.64347e-111	Progenitors	hirip3
6.57646e-118	0.272099	0.668	0.541	1.5554e-113	Progenitors	cnbpa
3.89405e-118	0.286808	0.489	0.362	9.20982e-114	Progenitors	bub3
7.55946e-119	0.288929	0.262	0.159	1.78789e-114	Progenitors	esco2
1.01341e-119	0.314557	0.327	0.21	2.39681e-115	Progenitors	hist1h4l.1
2.36047e-120	0.268022	0.825	0.749	5.58275e-116	Progenitors	atf4a
1.13035e-120	0.315821	0.562	0.428	2.67339e-116	Progenitors	sumo3b
8.98902e-121	0.280821	0.713	0.574	2.12599e-116	Progenitors	cd81a
2.46167e-122	0.282184	0.348	0.227	5.8221e-118	Progenitors	mad2l1
3.42152e-123	0.290434	0.298	0.186	8.09224e-119	Progenitors	si:ch211-113a14.19.1
2.38723e-123	0.268559	0.464	0.332	5.64603e-119	Progenitors	smg6
1.69838e-123	0.271236	0.332	0.211	4.01685e-119	Progenitors	rnf165a
2.48024e-127	0.290113	0.496	0.358	5.86601e-123	Progenitors	nfkbiab
3.48001e-128	0.269196	0.289	0.178	8.23057e-124	Progenitors	kif20a
2.36631e-128	0.394439	0.516	0.383	5.59657e-124	Progenitors	rbbp4
8.74262e-129	0.350241	0.768	0.676	2.06772e-124	Progenitors	ctnnb1
4.2561e-133	0.379172	0.31	0.195	1.00661e-128	Progenitors	kif11
4.63278e-134	0.275725	0.617	0.482	1.0957e-129	Progenitors	znf395a
3.37069e-134	0.34431	0.26	0.15	7.97202e-130	Progenitors	mcm2
2.93344e-134	0.305344	0.292	0.179	6.93788e-130	Progenitors	hmmr
2.79133e-134	0.297618	0.309	0.19	6.60178e-130	Progenitors	zgc:112234.7
7.44105e-135	0.371425	0.362	0.236	1.75988e-130	Progenitors	hist1h4l.2
5.75589e-136	0.281536	0.257	0.147	1.36133e-131	Progenitors	hist1h4l.21
2.18945e-136	0.343863	0.302	0.184	5.17826e-132	Progenitors	hist1h2a2
1.25816e-136	0.269655	0.32	0.2	2.97569e-132	Progenitors	ttk
3.39536e-137	0.296388	0.632	0.496	8.03036e-133	Progenitors	srsf1a
3.2214e-137	0.273901	0.432	0.294	7.61893e-133	Progenitors	kpnb3
7.85307e-138	0.277784	0.521	0.371	1.85733e-133	Progenitors	nutf2l
2.05996e-138	0.412612	0.227	0.123	4.87202e-134	Progenitors	epha4a
1.38381e-138	0.27544	0.267	0.156	3.27284e-134	Progenitors	kif20bb
8.91644e-139	0.282481	0.331	0.203	2.10883e-134	Progenitors	sall4
5.30501e-140	0.306249	0.609	0.465	1.25469e-135	Progenitors	bnip4
3.65219e-141	0.383389	0.166	0.076	8.6378e-137	Progenitors	her4.2
1.58486e-142	0.479429	0.33	0.206	3.74836e-138	Progenitors	si:ch211-69g19.2
2.39095e-143	0.305111	0.292	0.174	5.65485e-139	Progenitors	si:ch211-113a14.22.2
1.95216e-143	0.296868	0.297	0.176	4.61706e-139	Progenitors	hist1h4l.17
5.43246e-144	0.425887	0.448	0.306	1.28483e-139	Progenitors	her9
4.72724e-144	0.302538	0.632	0.473	1.11804e-139	Progenitors	nop56
2.75111e-145	0.307638	0.312	0.189	6.50666e-141	Progenitors	hist1h4l.8
2.28078e-145	0.273971	0.494	0.344	5.39426e-141	Progenitors	ppm1g
2.20957e-145	0.360443	0.746	0.656	5.22586e-141	Progenitors	cbx3a
1.32904e-146	0.374712	0.739	0.63	3.14332e-142	Progenitors	AL935186.10
9.06418e-147	0.355415	0.325	0.199	2.14377e-142	Progenitors	hist1h2a10.1
6.60515e-147	0.289504	0.432	0.288	1.56218e-142	Progenitors	ssrp1a
6.6662e-148	0.346784	0.757	0.665	1.57662e-143	Progenitors	snrpd1
9.8108e-149	0.421916	0.422	0.288	2.32035e-144	Progenitors	FP236812.1
4.62123e-150	0.299112	0.365	0.228	1.09297e-145	Progenitors	nuf2
4.40432e-151	0.306201	0.569	0.422	1.04167e-146	Progenitors	ctcf
2.78944e-151	0.291613	0.492	0.334	6.59732e-147	Progenitors	add3a
6.4152e-153	0.30361	0.301	0.177	1.51726e-148	Progenitors	krcp
9.54695e-155	0.351924	0.483	0.335	2.25795e-150	Progenitors	cdc14b
2.53944e-156	0.34331	0.309	0.182	6.00602e-152	Progenitors	si:ch211-113a14.19.3
2.20763e-156	0.351185	0.33	0.2	5.22128e-152	Progenitors	asf1ba
1.2374e-156	0.27659	0.49	0.345	2.92657e-152	Progenitors	timm23a
1.05266e-156	0.325424	0.291	0.167	2.48965e-152	Progenitors	hist1h2a11.1
1.02188e-156	0.271293	0.893	0.823	2.41685e-152	Progenitors	si:ch211-288g17.3
4.19266e-157	0.329282	0.29	0.167	9.91606e-153	Progenitors	aurka
1.92363e-157	0.401797	0.344	0.212	4.54957e-153	Progenitors	ccnb1
4.52223e-158	0.40638	0.499	0.354	1.06955e-153	Progenitors	mxi1
4.92093e-159	0.327723	0.329	0.196	1.16385e-154	Progenitors	zgc:173552.2
1.02542e-159	0.389718	0.366	0.225	2.42523e-155	Progenitors	si:dkey-23a13.17
6.02866e-160	0.27382	0.312	0.178	1.42584e-155	Progenitors	kirrel3l
2.90807e-160	0.318588	0.585	0.428	6.87788e-156	Progenitors	apex1
1.12334e-160	0.321012	0.31	0.18	2.65682e-156	Progenitors	mcm4
6.52434e-163	0.3784	0.343	0.207	1.54307e-158	Progenitors	hist1h2a11.4
3.20029e-163	0.353838	0.353	0.216	7.56901e-159	Progenitors	hist1h4l.3
3.07234e-164	0.407895	0.966	0.949	7.2664e-160	Progenitors	h3f3b.1
3.83637e-165	0.346655	0.766	0.624	9.0734e-161	Progenitors	tuba8l4
1.68654e-165	0.305165	0.422	0.276	3.98883e-161	Progenitors	tmpoa
4.76541e-167	0.316429	0.756	0.653	1.12707e-162	Progenitors	alyref
1.18195e-167	0.30704	0.481	0.332	2.79543e-163	Progenitors	tprb
1.48945e-168	0.410302	0.371	0.232	3.5227e-164	Progenitors	kifc1
7.06224e-169	0.331221	0.527	0.372	1.67029e-164	Progenitors	supt16h
6.61738e-169	0.268491	0.451	0.285	1.56508e-164	Progenitors	cd82a
5.78642e-169	0.384985	0.342	0.204	1.36855e-164	Progenitors	CU457819.5
3.93598e-169	0.416351	0.389	0.244	9.30898e-165	Progenitors	si:ch211-113a14.19
1.60069e-169	0.431961	0.362	0.226	3.78579e-165	Progenitors	tacc3
8.49536e-171	0.380475	0.36	0.218	2.00924e-166	Progenitors	si:ch1073-153i20.5
4.33064e-171	0.411869	0.406	0.254	1.02424e-166	Progenitors	si:ch73-368j24.11
3.37762e-171	0.325843	0.335	0.197	7.98842e-167	Progenitors	fbxo5
1.59881e-171	0.320567	0.47	0.308	3.78136e-167	Progenitors	si:dkey-7j14.6
1.38042e-172	0.359006	0.609	0.462	3.26484e-168	Progenitors	cbsb
3.89432e-173	0.397961	0.349	0.212	9.21045e-169	Progenitors	cenpe
3.28538e-173	0.374602	0.345	0.206	7.77026e-169	Progenitors	hist1h2a3.4
2.34004e-173	0.463956	0.707	0.573	5.53442e-169	Progenitors	pdia4
1.27334e-173	0.473377	0.369	0.23	3.01158e-169	Progenitors	slbp
8.84354e-174	0.366616	0.336	0.2	2.09159e-169	Progenitors	g2e3
2.95426e-174	0.323139	0.41	0.261	6.98711e-170	Progenitors	btg3
6.31702e-177	0.792154	0.308	0.174	1.49404e-172	Progenitors	her15.2
2.13289e-177	0.49214	0.247	0.123	5.04449e-173	Progenitors	fabp11a
3.34485e-178	0.397233	0.391	0.24	7.9109e-174	Progenitors	hist1h2a11.2
3.17319e-178	0.370494	0.352	0.208	7.5049e-174	Progenitors	CU459186.3
1.80246e-178	0.333904	0.798	0.703	4.263e-174	Progenitors	hdac1
1.34814e-178	0.318732	0.376	0.233	3.18848e-174	Progenitors	cdca5
1.04398e-178	0.32215	0.322	0.184	2.46913e-174	Progenitors	si:ch211-156b7.4
2.19576e-179	0.319588	0.538	0.371	5.1932e-175	Progenitors	vdrb
1.92644e-179	0.472447	0.204	0.093	4.55623e-175	Progenitors	CR848047.1
6.39948e-180	0.276737	0.348	0.205	1.51354e-175	Progenitors	hpf1
7.4091e-181	0.361065	0.639	0.501	1.75233e-176	Progenitors	lmnb1
4.34876e-181	0.346789	0.37	0.222	1.02853e-176	Progenitors	si:dkey-230p4.1
2.55628e-181	0.362657	0.621	0.452	6.04586e-177	Progenitors	anp32b
7.27035e-182	0.354487	0.76	0.658	1.71951e-177	Progenitors	rad21a
4.40367e-182	0.29282	0.306	0.173	1.04151e-177	Progenitors	knl1
9.83106e-184	0.279605	0.33	0.19	2.32514e-179	Progenitors	rpa1
1.79205e-184	0.371907	0.693	0.559	4.23837e-180	Progenitors	rbbp6
1.58235e-184	0.311926	0.815	0.718	3.74241e-180	Progenitors	mdh1aa
8.39259e-185	0.375653	0.414	0.261	1.98493e-180	Progenitors	rpa3
1.86311e-187	0.270363	0.568	0.391	4.40645e-183	Progenitors	vamp3
4.57781e-188	0.564803	0.346	0.201	1.0827e-183	Progenitors	ebf2
1.17189e-188	0.376413	0.584	0.426	2.77163e-184	Progenitors	lmnb2
4.48707e-190	0.503408	0.5	0.336	1.06124e-185	Progenitors	hist1h4l.10
3.56924e-190	0.300492	0.864	0.744	8.44161e-186	Progenitors	TXN
2.88025e-190	0.272844	0.329	0.186	6.81208e-186	Progenitors	mier1a
6.55941e-191	0.376048	0.388	0.238	1.55137e-186	Progenitors	spdl1
1.39271e-191	0.430285	0.396	0.241	3.2939e-187	Progenitors	FQ312024.1
1.27302e-191	0.294832	0.37	0.219	3.01081e-187	Progenitors	gpc4
7.35338e-192	0.312722	0.421	0.263	1.73915e-187	Progenitors	prim2
2.01988e-192	0.37562	0.341	0.197	4.77721e-188	Progenitors	FP325123.1
9.08765e-193	0.411768	0.452	0.289	2.14932e-188	Progenitors	aurkb
2.46832e-193	0.465433	0.343	0.199	5.83781e-189	Progenitors	si:dkey-23a13.21
8.35601e-194	0.357685	0.299	0.16	1.97628e-189	Progenitors	CU457819.3
7.325e-194	0.62671	0.266	0.134	1.73244e-189	Progenitors	her2
1.92236e-194	0.346826	0.745	0.552	4.54658e-190	Progenitors	ahcy
5.69302e-196	0.272239	0.533	0.351	1.34645e-191	Progenitors	lin28a
2.14881e-196	0.279571	0.375	0.22	5.08216e-192	Progenitors	rnaseh2a
1.13755e-196	0.369544	0.433	0.27	2.69042e-192	Progenitors	cks1b
6.62061e-197	0.360178	0.353	0.205	1.56584e-192	Progenitors	atad5a
4.56524e-197	0.529455	0.319	0.173	1.07973e-192	Progenitors	ascl1a
2.51893e-197	0.33141	0.423	0.263	5.95752e-193	Progenitors	rfc5
5.24005e-199	0.291469	0.366	0.209	1.23932e-194	Progenitors	slc29a1a
5.07616e-199	0.271961	0.323	0.179	1.20056e-194	Progenitors	parp2
1.48207e-199	0.512065	0.393	0.238	3.50525e-195	Progenitors	aspm
3.80701e-200	0.924144	0.33	0.191	9.00397e-196	Progenitors	cbx7a
9.08127e-201	0.350595	0.631	0.437	2.14781e-196	Progenitors	sdc4
7.56074e-201	0.389182	0.364	0.207	1.78819e-196	Progenitors	CR762436.2
6.56114e-201	0.325456	0.252	0.125	1.55177e-196	Progenitors	cbfa2t2
8.81552e-202	0.510973	0.465	0.302	2.08496e-197	Progenitors	plk1
6.27057e-202	0.451537	0.4	0.242	1.48305e-197	Progenitors	CU302436.1
1.56639e-202	0.271583	0.956	0.93	3.70467e-198	Progenitors	rpl5a
4.42835e-203	0.308867	0.27	0.138	1.04735e-198	Progenitors	CU693502.1
7.83986e-204	0.299437	0.382	0.225	1.85421e-199	Progenitors	aldob
3.70647e-204	0.524159	0.409	0.245	8.76617e-200	Progenitors	si:ch211-113a14.24
3.29645e-204	0.440789	0.387	0.23	7.79643e-200	Progenitors	hist1h2a3
1.46353e-204	0.309822	0.468	0.298	3.4614e-200	Progenitors	tcf7l1a
9.39545e-205	0.323867	0.341	0.194	2.22212e-200	Progenitors	kif4
6.63064e-205	0.414994	0.353	0.202	1.56821e-200	Progenitors	ano9a.1
8.06472e-206	0.379348	0.802	0.691	1.90739e-201	Progenitors	hnrnpa1b
6.24476e-206	0.432764	0.373	0.218	1.47695e-201	Progenitors	zgc:171759.4
4.43013e-206	0.511094	0.336	0.189	1.04777e-201	Progenitors	fgfr3
1.62194e-206	0.516809	0.409	0.253	3.83605e-202	Progenitors	cdc20
1.23812e-206	0.342549	0.391	0.229	2.92828e-202	Progenitors	fen1
4.71105e-207	0.371619	0.358	0.205	1.11421e-202	Progenitors	pola1
4.35214e-207	0.323514	0.488	0.316	1.02932e-202	Progenitors	srrt
3.96979e-207	0.292013	0.292	0.154	9.38894e-203	Progenitors	arhgap11a
2.12239e-207	0.438898	0.369	0.213	5.01967e-203	Progenitors	CU459186.5
4.73177e-208	0.49963	0.458	0.293	1.11911e-203	Progenitors	zgc:113983
3.3695e-209	0.318974	0.936	0.918	7.96921e-205	Progenitors	tubb4b
9.39394e-210	0.371388	0.621	0.445	2.22176e-205	Progenitors	selenoh
9.90689e-211	0.412713	0.366	0.209	2.34308e-206	Progenitors	si:ch211-286o17.1
2.80314e-211	0.455169	0.413	0.251	6.6297e-207	Progenitors	hist1h4l.9
3.76911e-212	0.360827	0.821	0.701	8.91432e-208	Progenitors	eif5a2
2.69948e-214	0.272745	0.381	0.214	6.38454e-210	Progenitors	junba
1.33264e-215	0.434032	0.586	0.404	3.15183e-211	Progenitors	banf1
1.41175e-216	0.66188	0.44	0.275	3.33892e-212	Progenitors	cenpf
6.53576e-217	0.345996	0.432	0.264	1.54577e-212	Progenitors	shmt1
2.58938e-217	0.275857	0.37	0.21	6.12414e-213	Progenitors	cbx2
9.65642e-218	0.294794	0.368	0.21	2.28384e-213	Progenitors	usp1
3.20146e-218	0.356592	0.356	0.199	7.57177e-214	Progenitors	crema
3.01439e-220	0.84994	0.232	0.106	7.12932e-216	Progenitors	si:dkey-85k7.7
3.33935e-221	0.645604	0.236	0.106	7.8979e-217	Progenitors	her4.4
1.60878e-221	0.26793	0.335	0.182	3.80492e-217	Progenitors	lmf2b
1.40466e-221	1.04655	0.303	0.159	3.32216e-217	Progenitors	her12
3.12455e-222	0.396053	0.429	0.261	7.38988e-218	Progenitors	smc4
2.85365e-223	0.420727	0.708	0.519	6.74917e-219	Progenitors	tcf12
2.3077e-223	0.39234	0.359	0.203	5.45795e-219	Progenitors	hist1h4l.20
2.20978e-223	0.504986	0.423	0.254	5.22636e-219	Progenitors	si:ch73-36p18.1
2.93957e-224	0.422184	0.833	0.749	6.95238e-220	Progenitors	anp32a
3.32468e-226	0.578714	0.511	0.346	7.8632e-222	Progenitors	zgc:173587
4.94132e-227	0.411868	0.423	0.252	1.16867e-222	Progenitors	smc2
4.27002e-229	0.570477	0.367	0.209	1.0099e-224	Progenitors	hist1h2a3.3
1.27398e-229	0.565057	0.423	0.254	3.01308e-225	Progenitors	hist1h2a11.3
1.03391e-229	0.969897	0.115	0.031	2.4453e-225	Progenitors	prdm12b
1.47186e-231	0.326314	0.37	0.207	3.4811e-227	Progenitors	arhgef12b
4.78274e-232	0.390561	0.88	0.808	1.13117e-227	Progenitors	acin1a
1.8434e-232	0.484404	0.638	0.45	4.35982e-228	Progenitors	atp1b1a
1.52002e-232	0.513464	0.465	0.286	3.59501e-228	Progenitors	hist2h3c
6.29689e-233	0.347852	0.368	0.203	1.48928e-228	Progenitors	jarid2b
3.17428e-235	0.401889	0.696	0.546	7.50749e-231	Progenitors	ewsr1b
1.30021e-235	0.297904	0.169	0.059	3.07512e-231	Progenitors	stra6
3.07276e-236	0.595825	0.471	0.296	7.26739e-232	Progenitors	mibp
9.9578e-239	0.311748	0.945	0.907	2.35512e-234	Progenitors	rpl4
8.22448e-239	0.408352	0.411	0.241	1.94517e-234	Progenitors	si:ch211-161h7.4
1.33053e-242	0.363484	0.396	0.23	3.14684e-238	Progenitors	ncapd2
7.51059e-243	0.268838	0.412	0.228	1.77633e-238	Progenitors	phf21aa
4.8621e-243	0.583429	0.503	0.319	1.14993e-238	Progenitors	si:ch211-113a14.19.2
5.45484e-244	0.52701	0.425	0.251	1.29012e-239	Progenitors	si:dkey-108k21.19
4.96309e-245	0.471711	0.654	0.473	1.17382e-240	Progenitors	sinhcafl.1
3.96852e-245	0.330347	0.422	0.246	9.38595e-241	Progenitors	baz1a.1
3.88606e-245	0.462764	0.265	0.126	9.19091e-241	Progenitors	endouc
2.64108e-245	0.344992	0.349	0.187	6.24643e-241	Progenitors	cdca7b
2.49623e-246	0.553765	0.476	0.294	5.90384e-242	Progenitors	si:dkey-108k21.21
9.4956e-247	0.296288	0.353	0.184	2.2458e-242	Progenitors	nhsl2
7.68525e-247	0.356387	0.446	0.26	1.81764e-242	Progenitors	smad3a
3.02984e-247	0.994397	0.444	0.265	7.16588e-243	Progenitors	her15.1
2.71254e-247	0.331235	0.33	0.17	6.41542e-243	Progenitors	gli3
3.12454e-248	0.312111	0.384	0.213	7.38985e-244	Progenitors	znf217
1.35676e-248	0.41148	0.565	0.38	3.20888e-244	Progenitors	mib1
5.66749e-249	0.464917	0.461	0.284	1.34042e-244	Progenitors	ncapg
1.82754e-249	0.601273	0.586	0.407	4.32232e-245	Progenitors	zgc:194989
7.2214e-250	0.583017	0.485	0.3	1.70793e-245	Progenitors	si:ch1073-153i20.4
5.93038e-251	0.514972	0.391	0.219	1.40259e-246	Progenitors	hist1h2a5
4.22615e-251	0.61509	0.456	0.28	9.99526e-247	Progenitors	CU457819.1
3.48546e-251	0.305987	0.231	0.094	8.24346e-247	Progenitors	rhbdl3
2.5545e-251	0.533372	0.764	0.633	6.04164e-247	Progenitors	cdh2
2.1129e-251	0.286855	0.322	0.161	4.99722e-247	Progenitors	ptpn13
5.47261e-252	0.591817	0.471	0.288	1.29433e-247	Progenitors	hist1h2a10
3.47714e-252	0.469273	0.4	0.225	8.22378e-248	Progenitors	fosab
4.57739e-253	0.403744	0.547	0.356	1.0826e-248	Progenitors	efnb3b
1.69726e-253	0.31356	0.352	0.181	4.01419e-249	Progenitors	mycla
1.4545e-253	0.398999	0.368	0.201	3.44004e-249	Progenitors	gnmt
2.36199e-254	0.278563	0.358	0.186	5.58635e-250	Progenitors	skib
1.14047e-254	0.267374	0.306	0.15	2.69732e-250	Progenitors	gli2a
1.37168e-255	0.340808	0.403	0.227	3.24415e-251	Progenitors	stat3
9.62357e-256	1.06275	0.331	0.173	2.27607e-251	Progenitors	her4.1
3.85193e-256	0.350025	0.475	0.286	9.11019e-252	Progenitors	C7H16orf87
1.50343e-256	0.461667	0.751	0.635	3.55576e-252	Progenitors	smc1al
1.30077e-256	0.325581	0.346	0.181	3.07645e-252	Progenitors	lrp5
4.66507e-259	0.915663	0.32	0.16	1.10334e-254	Progenitors	her4.2.1
2.42151e-260	0.481026	0.59	0.385	5.72712e-256	Progenitors	cnn3a
1.87294e-260	0.280323	0.264	0.116	4.4297e-256	Progenitors	zbtb16b
1.08005e-260	0.381106	0.548	0.354	2.55443e-256	Progenitors	tspan7
2.32694e-261	0.631839	0.429	0.251	5.50346e-257	Progenitors	hist1h2a1
9.69659e-262	0.867891	0.366	0.198	2.29334e-257	Progenitors	neurod4
4.93186e-264	0.381289	0.398	0.22	1.16643e-259	Progenitors	uhrf1
1.79918e-265	0.705368	0.641	0.461	4.25524e-261	Progenitors	zgc:110425
9.07179e-266	0.602821	0.482	0.295	2.14557e-261	Progenitors	tpx2
4.55804e-266	0.333641	0.98	0.958	1.07802e-261	Progenitors	rpl29
9.55795e-267	0.594479	0.497	0.304	2.26055e-262	Progenitors	si:dkey-261m9.12
6.14153e-267	0.482001	0.545	0.349	1.45253e-262	Progenitors	dek
3.12176e-271	0.419308	0.815	0.72	7.38327e-267	Progenitors	snrpb
2.51728e-271	0.398071	0.921	0.873	5.95361e-267	Progenitors	atp6v0e1
2.00854e-273	0.285651	1	0.998	4.75039e-269	Progenitors	si:dkey-151g10.6
1.78195e-273	0.357731	0.403	0.215	4.2145e-269	Progenitors	tenm4
1.31306e-273	0.408061	0.286	0.132	3.10551e-269	Progenitors	plekhh1
1.84116e-275	0.619252	0.461	0.275	4.35452e-271	Progenitors	FP236630.1
5.51515e-276	0.480151	0.812	0.708	1.30439e-271	Progenitors	si:dkey-42i9.4
3.74206e-277	0.606024	0.507	0.311	8.85035e-273	Progenitors	zgc:173552
2.42883e-277	0.570269	0.498	0.306	5.74443e-273	Progenitors	dlgap5
4.05638e-279	0.291315	0.329	0.161	9.59374e-275	Progenitors	ptgr1
2.68827e-279	0.392063	0.564	0.35	6.35802e-275	Progenitors	pcdh19
2.12743e-279	0.297632	0.357	0.179	5.0316e-275	Progenitors	dtx4a
8.41358e-281	0.477401	0.423	0.241	1.9899e-276	Progenitors	ccna2
5.23583e-281	0.540431	0.543	0.343	1.23833e-276	Progenitors	nasp
1.07984e-281	0.656078	0.458	0.274	2.55394e-277	Progenitors	top2a
3.0846e-283	0.450975	0.729	0.516	7.2954e-279	Progenitors	msna
9.38737e-284	0.784942	0.714	0.538	2.22021e-279	Progenitors	hist1h4l.11
9.17806e-284	0.65311	0.518	0.322	2.1707e-279	Progenitors	hist1h2a3.1
6.63927e-284	0.577517	0.501	0.306	1.57025e-279	Progenitors	CABZ01005379.1
5.15712e-285	0.61606	0.413	0.222	1.21971e-280	Progenitors	im:7152348
1.49158e-285	0.269301	0.236	0.094	3.52774e-281	Progenitors	fgfr1b
1.08841e-285	0.375647	0.491	0.291	2.57419e-281	Progenitors	smarca5
2.35936e-286	0.421761	0.482	0.291	5.58012e-282	Progenitors	c
1.48905e-286	0.371328	0.135	0.034	3.52174e-282	Progenitors	foxj1a
1.79181e-287	0.393032	0.421	0.23	4.23781e-283	Progenitors	parp1
1.65353e-287	0.504485	0.652	0.465	3.91077e-283	Progenitors	tp53inp1
4.35409e-288	0.383107	0.406	0.222	1.02979e-283	Progenitors	si:ch211-108d22.2
3.83062e-288	0.587512	0.636	0.436	9.05981e-284	Progenitors	tuba8l
3.31901e-289	0.615152	0.461	0.268	7.84978e-285	Progenitors	CU459186.2
4.98186e-291	0.269787	0.229	0.087	1.17826e-286	Progenitors	lipg
1.99575e-292	0.398286	0.52	0.315	4.72015e-288	Progenitors	rgl1
4.67352e-294	0.643819	0.483	0.283	1.10533e-289	Progenitors	zgc:153405
6.14679e-296	0.387686	0.518	0.301	1.45378e-291	Progenitors	nrarpa
3.21775e-298	0.613647	0.473	0.285	7.61031e-294	Progenitors	CABZ01058261.1
4.36443e-299	0.350731	0.11	0.021	1.03223e-294	Progenitors	zgc:101100
2.68593e-299	0.790576	0.421	0.227	6.3525e-295	Progenitors	dlb
5.0829e-300	0.312951	0.994	0.981	1.20216e-295	Progenitors	actb2
1.7466e-302	0.294473	0.418	0.214	4.13088e-298	Progenitors	adgrg1.1
1.46583e-302	0.463106	0.608	0.403	3.46683e-298	Progenitors	dag1
1.06404e-302	0.374439	0.194	0.062	2.51657e-298	Progenitors	en2b
2.5515e-303	0.693953	0.525	0.322	6.03456e-299	Progenitors	si:ch211-113a14.18
9.66433e-304	0.390023	0.439	0.24	2.28571e-299	Progenitors	dnmbp
7.00324e-304	0.38304	0.416	0.215	1.65634e-299	Progenitors	fgfr4
3.14952e-307	0.424727	0.946	0.893	7.44892e-303	Progenitors	cirbpa
0	0.608494	0.993	0.971	0	Progenitors	si:ch211-222l21.1
0	0.696745	0.989	0.938	0	Progenitors	hmga1a
0	0.716135	0.987	0.967	0	Progenitors	hmgn2
0	0.429246	0.974	0.896	0	Progenitors	actb1
0	0.443457	0.957	0.917	0	Progenitors	ran
0	0.583158	0.95	0.904	0	Progenitors	h2az2b
0	0.843569	0.947	0.747	0	Progenitors	hmgb2a
0	0.808955	0.945	0.873	0	Progenitors	zgc:153409
0	0.644667	0.938	0.866	0	Progenitors	fabp3
0	0.778224	0.932	0.826	0	Progenitors	hmgb2b
0	0.617447	0.921	0.837	0	Progenitors	si:ch73-281n10.2
0	0.656532	0.857	0.746	0	Progenitors	igf2bp1
0	0.709028	0.855	0.683	0	Progenitors	sox11b
0	0.626253	0.84	0.7	0	Progenitors	seta
0	0.858685	0.837	0.562	0	Progenitors	si:ch211-137a8.4
0	0.966803	0.826	0.54	0	Progenitors	mdka
0	0.49629	0.812	0.697	0	Progenitors	snrpf
0	0.939014	0.8	0.539	0	Progenitors	psat1
0	1.41686	0.791	0.332	0	Progenitors	sox3
0	0.987192	0.789	0.598	0	Progenitors	hist1h4l.6
0	0.744816	0.778	0.535	0	Progenitors	btg2
0	0.536406	0.775	0.58	0	Progenitors	mex3b
0	0.657571	0.772	0.568	0	Progenitors	chd7
0	1.58741	0.765	0.358	0	Progenitors	dla
0	0.896889	0.765	0.548	0	Progenitors	zgc:173552.3
0	0.618185	0.755	0.543	0	Progenitors	phgdh
0	0.537543	0.749	0.555	0	Progenitors	ranbp1
0	1.52813	0.748	0.385	0	Progenitors	cep131
0	0.892231	0.747	0.315	0	Progenitors	msi1
0	0.909801	0.746	0.534	0	Progenitors	angptl4
0	1.13403	0.744	0.4	0	Progenitors	notch3
0	1.07276	0.744	0.443	0	Progenitors	rrm2
0	1.31704	0.738	0.357	0	Progenitors	gadd45gb.1
0	0.756933	0.737	0.425	0	Progenitors	akap12b
0	0.638729	0.734	0.512	0	Progenitors	tgif1
0	1.38466	0.722	0.38	0	Progenitors	id1
0	1.08701	0.717	0.361	0	Progenitors	notch1a
0	0.668418	0.708	0.45	0	Progenitors	stmn1a
0	0.545993	0.699	0.363	0	Progenitors	pou3f1
0	1.22977	0.697	0.306	0	Progenitors	lfng
0	0.653627	0.691	0.484	0	Progenitors	cx43.4
0	0.4328	0.684	0.392	0	Progenitors	fabp7a
0	0.624795	0.68	0.356	0	Progenitors	pou3f3b
0	1.4528	0.667	0.219	0	Progenitors	sb:cb81
0	0.650885	0.666	0.293	0	Progenitors	sox2
0	1.01447	0.661	0.263	0	Progenitors	cldn5a
0	0.592751	0.652	0.433	0	Progenitors	srgap3
0	0.441567	0.652	0.419	0	Progenitors	wasf3b
0	1.12174	0.648	0.287	0	Progenitors	lrrn1
0	0.667334	0.647	0.432	0	Progenitors	lbr
0	1.34949	0.646	0.162	0	Progenitors	sox19a
0	0.588689	0.646	0.379	0	Progenitors	zeb2a
0	0.720269	0.64	0.418	0	Progenitors	hist1h4l.16
0	0.77609	0.638	0.394	0	Progenitors	pcna
0	1.23876	0.634	0.226	0	Progenitors	si:ch211-212k18.5
0	0.857581	0.632	0.382	0	Progenitors	mki67
0	0.611085	0.627	0.368	0	Progenitors	boc
0	1.10206	0.626	0.235	0	Progenitors	nrarpb
0	0.860103	0.615	0.39	0	Progenitors	cdkn1ca
0	1.07149	0.609	0.368	0	Progenitors	zbtb16a
0	0.716874	0.608	0.358	0	Progenitors	chaf1a
0	0.416078	0.606	0.347	0	Progenitors	hes6
0	0.802804	0.605	0.394	0	Progenitors	hist1h2a6
0	0.726499	0.605	0.401	0	Progenitors	si:dkey-108k21.10
0	0.860099	0.6	0.216	0	Progenitors	celsr1b
0	0.628746	0.593	0.303	0	Progenitors	zbtb18
0	1.27196	0.59	0.248	0	Progenitors	nes
0	0.755657	0.571	0.365	0	Progenitors	si:ch211-113a14.12
0	0.52464	0.57	0.308	0	Progenitors	ncalda
0	0.494931	0.568	0.336	0	Progenitors	smo
0	0.986758	0.565	0.179	0	Progenitors	tmem47
0	0.741437	0.565	0.317	0	Progenitors	rtca
0	0.708391	0.555	0.353	0	Progenitors	trim71
0	0.455153	0.554	0.343	0	Progenitors	arvcfb
0	0.489351	0.553	0.335	0	Progenitors	rasgef1ba
0	1.36702	0.55	0.142	0	Progenitors	gfap
0	0.910429	0.55	0.325	0	Progenitors	nat8l
0	0.614866	0.55	0.314	0	Progenitors	rrm1
0	0.493748	0.55	0.325	0	Progenitors	ccnd1
0	0.401041	0.55	0.313	0	Progenitors	ctnnd2b
0	1.29577	0.543	0.305	0	Progenitors	abhd6a
0	0.599422	0.543	0.322	0	Progenitors	dut
0	0.658726	0.542	0.299	0	Progenitors	syne2b
0	0.917728	0.536	0.221	0	Progenitors	gas1b
0	0.588135	0.536	0.316	0	Progenitors	map2k6
0	0.720919	0.532	0.302	0	Progenitors	jdp2b
0	0.433143	0.531	0.311	0	Progenitors	cecr2
0	1.2048	0.527	0.224	0	Progenitors	GADD45G
0	0.490999	0.527	0.3	0	Progenitors	dusp1
0	0.729256	0.526	0.3	0	Progenitors	BX465834.1
0	0.472111	0.522	0.256	0	Progenitors	rassf2a
0	0.703292	0.52	0.249	0	Progenitors	fgfr2
0	0.983678	0.519	0.184	0	Progenitors	dld
0	0.453512	0.518	0.304	0	Progenitors	fzd7a
0	0.683673	0.513	0.176	0	Progenitors	irx3a
0	0.826406	0.512	0.228	0	Progenitors	pax6a
0	0.718491	0.51	0.314	0	Progenitors	zgc:173552.7
0	0.591782	0.509	0.238	0	Progenitors	ENSDARG00000040725
0	0.521472	0.506	0.293	0	Progenitors	cdc25b
0	0.689167	0.503	0.299	0	Progenitors	nusap1
0	0.496036	0.497	0.259	0	Progenitors	plagx
0	0.637136	0.496	0.291	0	Progenitors	hist1h4l.14
0	1.45914	0.491	0.2	0	Progenitors	si:ch73-21g5.7
0	0.506871	0.49	0.187	0	Progenitors	irx5a
0	0.567115	0.488	0.248	0	Progenitors	shroom2a
0	0.484912	0.482	0.208	0	Progenitors	ptprna
0	0.836248	0.481	0.162	0	Progenitors	nin
0	0.734257	0.481	0.261	0	Progenitors	pcdh18b
0	0.573003	0.476	0.263	0	Progenitors	lig1
0	0.620793	0.472	0.199	0	Progenitors	map7d1a
0	0.511182	0.471	0.176	0	Progenitors	pou3f3a
0	0.445354	0.47	0.267	0	Progenitors	ptprfb
0	0.394833	0.467	0.251	0	Progenitors	jam3b
0	0.41969	0.465	0.261	0	Progenitors	rasal2
0	0.57609	0.464	0.168	0	Progenitors	notch1b
0	0.343787	0.461	0.258	0	Progenitors	zgc:92242
0	0.583104	0.457	0.172	0	Progenitors	dhx32b
0	0.612271	0.456	0.208	0	Progenitors	homeza
0	0.437006	0.453	0.25	0	Progenitors	tfdp2
0	0.733204	0.452	0.251	0	Progenitors	si:ch211-113a14.11
0	0.493861	0.451	0.203	0	Progenitors	si:ch211-214c7.4
0	1.46167	0.447	0.104	0	Progenitors	ascl1b.1
0	0.400826	0.446	0.205	0	Progenitors	45181
0	0.926572	0.442	0.166	0	Progenitors	metrn
0	0.413062	0.437	0.194	0	Progenitors	sept9b
0	0.482081	0.429	0.193	0	Progenitors	zgc:110796
0	0.458242	0.428	0.208	0	Progenitors	zgc:92107
0	0.446374	0.428	0.229	0	Progenitors	nsd2
0	0.801793	0.426	0.1	0	Progenitors	fgfbp3
0	0.293622	0.424	0.18	0	Progenitors	pou3f2a
0	0.987324	0.42	0.145	0	Progenitors	CR751602.2
0	0.75921	0.408	0.191	0	Progenitors	slc6a9
0	0.750153	0.404	0.141	0	Progenitors	prtgb
0	0.390116	0.401	0.181	0	Progenitors	rnd1b
0	0.50548	0.392	0.191	0	Progenitors	si:dkey-195m11.8
0	0.486252	0.389	0.15	0	Progenitors	gpm6bb
0	0.670369	0.387	0.151	0	Progenitors	inavaa
0	0.414451	0.376	0.126	0	Progenitors	fam167ab
0	1.53021	0.374	0.111	0	Progenitors	neurog1
0	0.582387	0.372	0.186	0	Progenitors	rasgef1bb
0	0.500603	0.368	0.155	0	Progenitors	her8a
0	0.323326	0.368	0.156	0	Progenitors	ADGRL2
0	0.346681	0.366	0.182	0	Progenitors	plekhg4
0	0.490553	0.362	0.1	0	Progenitors	lamb2l
0	0.578035	0.359	0.109	0	Progenitors	ddr1
0	0.937777	0.345	0.076	0	Progenitors	pax3a
0	0.337979	0.343	0.145	0	Progenitors	arhgef10la
0	0.430958	0.338	0.084	0	Progenitors	sox19b
0	0.476161	0.337	0.108	0	Progenitors	sall1a
0	0.612372	0.336	0.068	0	Progenitors	plp1a
0	0.441057	0.334	0.087	0	Progenitors	npas1
0	0.28159	0.334	0.152	0	Progenitors	ildr2
0	0.604751	0.322	0.061	0	Progenitors	sall3b
0	0.539784	0.321	0.101	0	Progenitors	otx2b
0	0.315616	0.321	0.132	0	Progenitors	dennd2b
0	0.69172	0.318	0.132	0	Progenitors	her13
0	0.280451	0.317	0.145	0	Progenitors	arrb2b
0	0.542619	0.313	0.071	0	Progenitors	atp1b4
0	0.48459	0.307	0.063	0	Progenitors	mapk12b
0	0.561526	0.292	0.077	0	Progenitors	ntn1a
0	0.286379	0.292	0.117	0	Progenitors	mpp5a
0	0.358698	0.291	0.116	0	Progenitors	sox13
0	0.579914	0.289	0.029	0	Progenitors	sp8b
0	0.771046	0.286	0.04	0	Progenitors	robo4
0	0.30007	0.285	0.1	0	Progenitors	si:ch211-269k10.2
0	0.412693	0.281	0.073	0	Progenitors	si:ch211-57n23.4
0	0.31218	0.272	0.091	0	Progenitors	efcc1
0	0.385595	0.271	0.066	0	Progenitors	rfx4
0	0.403841	0.267	0.096	0	Progenitors	prox1a
0	0.353224	0.262	0.102	0	Progenitors	epha2a
0	0.533901	0.26	0.057	0	Progenitors	ptprz1b
0	0.296347	0.26	0.08	0	Progenitors	lrp2a
0	1.79045	0.257	0.047	0	Progenitors	dbx1a
0	0.485898	0.257	0.036	0	Progenitors	wnt7aa
0	0.296031	0.257	0.102	0	Progenitors	uacab
0	0.348797	0.25	0.064	0	Progenitors	pcdh1g32
0	0.282104	0.244	0.091	0	Progenitors	plxdc2
0	0.497546	0.242	0.041	0	Progenitors	pax7a
0	0.505795	0.241	0.091	0	Progenitors	atp1a1b
0	0.788899	0.23	0.046	0	Progenitors	si:ch73-265d7.2
0	0.530985	0.219	0.031	0	Progenitors	sp8a
0	0.284402	0.213	0.053	0	Progenitors	col5a3a
0	1.41314	0.201	0.042	0	Progenitors	gsx1
0	0.331695	0.197	0.044	0	Progenitors	sulf2a
0	0.454739	0.196	0.044	0	Progenitors	otx2a
0	0.900011	0.189	0.021	0	Progenitors	dbx1b
0	0.324605	0.188	0.037	0	Progenitors	ptprz1a
0	0.315174	0.175	0.043	0	Progenitors	gbx1
0	0.367491	0.157	0.015	0	Progenitors	sox21a
0	0.475766	0.156	0.018	0	Progenitors	mpz
0	0.348463	0.151	0.029	0	Progenitors	bicc2
0	0.333784	0.145	0.035	0	Progenitors	prdm8
0	2.21852	0.86	0.407	0	Retina neurogenesis	fabp7a
0	2.09207	0.225	0.04	0	Retina neurogenesis	atoh7
0	1.70926	0.573	0.051	0	Retina neurogenesis	foxg1b
0	1.62819	0.682	0.145	0	Retina neurogenesis	pax6b
0	1.48522	0.206	0.017	0	Retina neurogenesis	crx
0	1.45523	0.487	0.101	0	Retina neurogenesis	foxn4
0	1.42094	0.292	0.03	0	Retina neurogenesis	vsx1
0	1.35089	0.373	0.089	0	Retina neurogenesis	hes2.2
0	1.32383	0.628	0.065	0	Retina neurogenesis	six6b
0	1.27184	0.67	0.338	0	Retina neurogenesis	ccnd1
0	1.23892	0.566	0.075	0	Retina neurogenesis	slc38a3a
0	1.23055	0.699	0.439	0	Retina neurogenesis	hist1h4l.16
0	1.21782	0.644	0.375	0	Retina neurogenesis	hes6
0	1.12449	0.626	0.085	0	Retina neurogenesis	six3b
0	1.11632	0.515	0.029	0	Retina neurogenesis	rx1
0	1.11039	0.701	0.417	0	Retina neurogenesis	pcna
0	1.0938	0.7	0.24	0	Retina neurogenesis	pax6a
0	1.05	0.848	0.564	0	Retina neurogenesis	ahcy
0	1.0201	0.41	0.168	0	Retina neurogenesis	neurod1
0	0.986112	0.268	0.043	0	Retina neurogenesis	cx43
0	0.983937	0.431	0.038	0	Retina neurogenesis	vsx2
0	0.978566	0.738	0.448	0	Retina neurogenesis	lbr
0	0.969922	0.733	0.483	0	Retina neurogenesis	rrm2
0	0.95976	0.535	0.198	0	Retina neurogenesis	neurod4
0	0.944538	0.684	0.407	0	Retina neurogenesis	mki67
0	0.93484	0.13	0.007	0	Retina neurogenesis	otx5
0	0.871492	0.915	0.777	0	Retina neurogenesis	hmgb2a
0	0.85688	0.742	0.433	0	Retina neurogenesis	anp32e
0	0.850223	0.464	0.139	0	Retina neurogenesis	myca
0	0.839888	0.324	0.02	0	Retina neurogenesis	prdm1b
0	0.825259	0.477	0.056	0	Retina neurogenesis	tbx2b
0	0.823305	0.754	0.369	0	Retina neurogenesis	msi1
0	0.803985	0.68	0.329	0	Retina neurogenesis	zbtb18
0	0.788623	0.419	0.109	0	Retina neurogenesis	dlc
0	0.787311	0.492	0.196	0	Retina neurogenesis	pnpla6
0	0.775825	0.745	0.485	0	Retina neurogenesis	sinhcafl.1
0	0.763974	0.689	0.31	0	Retina neurogenesis	cadm3
0	0.762773	0.612	0.317	0	Retina neurogenesis	CABZ01005379.1
0	0.762633	0.613	0.302	0	Retina neurogenesis	rbpjb
0	0.748861	0.633	0.334	0	Retina neurogenesis	rrm1
0	0.740117	0.475	0.171	0	Retina neurogenesis	ascl1a
0	0.71292	0.423	0.178	0	Retina neurogenesis	zgc:110540
0	0.693427	0.239	0.055	0	Retina neurogenesis	bhlhe22
0	0.685211	0.433	0.12	0	Retina neurogenesis	proca1
0	0.684275	0.32	0.027	0	Retina neurogenesis	hmx4
0	0.681451	0.669	0.38	0	Retina neurogenesis	rbbp4
0	0.676055	0.396	0.044	0	Retina neurogenesis	myb
0	0.669802	0.642	0.274	0	Retina neurogenesis	EPB41L2
0	0.665747	0.527	0.248	0	Retina neurogenesis	arg2
0	0.656628	0.321	0.021	0	Retina neurogenesis	hmx1
0	0.655548	0.724	0.456	0	Retina neurogenesis	slc25a55a
0	0.638122	0.639	0.362	0	Retina neurogenesis	dek
0	0.622297	0.928	0.86	0	Retina neurogenesis	atp5mc3b
0	0.603941	0.472	0.182	0	Retina neurogenesis	si:ch211-156b7.4
0	0.60037	0.63	0.358	0	Retina neurogenesis	nasp
0	0.592878	0.1	0.005	0	Retina neurogenesis	nr2e3
0	0.592817	0.452	0.2	0	Retina neurogenesis	fbxo5
0	0.590733	0.446	0.12	0	Retina neurogenesis	zic2b
0	0.590162	0.504	0.235	0	Retina neurogenesis	fen1
0	0.58337	0.557	0.28	0	Retina neurogenesis	lig1
0	0.582958	0.501	0.231	0	Retina neurogenesis	slbp
0	0.567532	0.391	0.056	0	Retina neurogenesis	mybl1
0	0.561066	0.469	0.199	0	Retina neurogenesis	asf1ba
0	0.555865	0.432	0.065	0	Retina neurogenesis	si:ch211-284e13.6
0	0.549093	0.424	0.07	0	Retina neurogenesis	rorcb
0	0.545183	0.449	0.161	0	Retina neurogenesis	dnmt1
0	0.533779	0.56	0.16	0	Retina neurogenesis	pcbp4
0	0.523019	0.388	0.087	0	Retina neurogenesis	rrs1
0	0.522957	0.354	0.036	0	Retina neurogenesis	tbx2a
0	0.519221	0.468	0.084	0	Retina neurogenesis	rorab
0	0.510596	0.432	0.15	0	Retina neurogenesis	esco2
0	0.508734	0.512	0.259	0	Retina neurogenesis	rpa2
0	0.504773	0.492	0.207	0	Retina neurogenesis	pola1
0	0.497753	0.302	0.088	0	Retina neurogenesis	mcm6
0	0.496043	0.313	0.096	0	Retina neurogenesis	mcm5
0	0.489472	0.354	0.101	0	Retina neurogenesis	si:ch211-207i1.2
0	0.489182	0.445	0.175	0	Retina neurogenesis	krcp
0	0.488928	0.518	0.249	0	Retina neurogenesis	si:ch211-161h7.4
0	0.487857	0.442	0.134	0	Retina neurogenesis	usp54a
0	0.477248	0.225	0.029	0	Retina neurogenesis	bcl2l13
0	0.474263	0.412	0.156	0	Retina neurogenesis	map7d3
0	0.464722	0.449	0.198	0	Retina neurogenesis	atad2
0	0.46332	0.513	0.244	0	Retina neurogenesis	nsd2
0	0.455709	0.449	0.072	0	Retina neurogenesis	six3a
0	0.454981	0.416	0.178	0	Retina neurogenesis	h2ax
0	0.454755	0.35	0.057	0	Retina neurogenesis	crip3
0	0.449097	0.491	0.213	0	Retina neurogenesis	slc29a1a
0	0.437935	0.547	0.252	0	Retina neurogenesis	baz1a.1
0	0.4279	0.283	0.085	0	Retina neurogenesis	inhbb
0	0.42616	0.287	0.076	0	Retina neurogenesis	rbpms2a
0	0.423528	0.465	0.21	0	Retina neurogenesis	atad5a
0	0.421653	0.363	0.133	0	Retina neurogenesis	e2f8
0	0.417098	0.997	0.995	0	Retina neurogenesis	rplp0
0	0.406279	0.996	0.988	0	Retina neurogenesis	rpl11
0	0.397455	0.389	0.14	0	Retina neurogenesis	ccne2
0	0.392542	0.216	0.049	0	Retina neurogenesis	ptprua
0	0.386256	0.995	0.989	0	Retina neurogenesis	rpl7
0	0.386078	0.995	0.989	0	Retina neurogenesis	rps3a
0	0.385893	0.999	0.994	0	Retina neurogenesis	rps7
0	0.38554	0.999	0.998	0	Retina neurogenesis	rplp1
0	0.372304	0.993	0.976	0	Retina neurogenesis	rpl3
0	0.3686	0.383	0.143	0	Retina neurogenesis	mknk1
0	0.365038	0.997	0.992	0	Retina neurogenesis	rps8a
0	0.354968	0.998	0.995	0	Retina neurogenesis	rpl8
0	0.35464	0.12	0.006	0	Retina neurogenesis	pax10
0	0.349588	0.255	0.015	0	Retina neurogenesis	rorb
0	0.343139	0.998	0.995	0	Retina neurogenesis	rpl7a
0	0.340083	0.997	0.994	0	Retina neurogenesis	rpsa
0	0.339662	0.268	0.055	0	Retina neurogenesis	svila
0	0.331929	0.284	0.087	0	Retina neurogenesis	bambia
0	0.317686	0.419	0.118	0	Retina neurogenesis	dclk2a
0	0.311884	0.271	0.069	0	Retina neurogenesis	hells
0	0.306263	0.211	0.054	0	Retina neurogenesis	cldn5b
0	0.301284	0.139	0.018	0	Retina neurogenesis	trpm1b
0	0.295338	0.271	0.067	0	Retina neurogenesis	nr2e1
0	0.294599	0.375	0.128	0	Retina neurogenesis	nr1d2b
0	0.288668	0.245	0.022	0	Retina neurogenesis	ephb2a
0	0.285306	0.285	0.034	0	Retina neurogenesis	AL954322.2
0	0.284266	0.236	0.01	0	Retina neurogenesis	ephb6
0	0.279486	0.342	0.124	0	Retina neurogenesis	gins4
5.91532e-307	0.331046	0.997	0.99	1.39903e-302	Retina neurogenesis	rpl10
6.89551e-306	0.47199	0.371	0.15	1.63086e-301	Retina neurogenesis	mpp6b
2.83163e-305	0.428042	0.348	0.132	6.69708e-301	Retina neurogenesis	mid1ip1l
1.09253e-303	0.357987	0.995	0.985	2.58395e-299	Retina neurogenesis	rpl12
1.24496e-302	0.668772	0.848	0.716	2.94444e-298	Retina neurogenesis	seta
2.46028e-302	0.494018	0.988	0.945	5.81882e-298	Retina neurogenesis	hmga1a
4.22136e-302	1.89074	0.161	0.035	9.98393e-298	Retina neurogenesis	pde6gb
5.26662e-300	0.466758	0.419	0.173	1.24561e-295	Retina neurogenesis	acbd7
1.40196e-299	0.402079	0.411	0.183	3.31576e-295	Retina neurogenesis	tktb
1.93647e-297	0.276316	0.395	0.161	4.57995e-293	Retina neurogenesis	mapk14a
1.32562e-295	0.543429	0.634	0.39	3.13521e-291	Retina neurogenesis	pa2g4b
3.8148e-295	0.285654	0.281	0.093	9.02239e-291	Retina neurogenesis	cdc6
3.86513e-295	0.664962	0.841	0.597	9.14141e-291	Retina neurogenesis	si:ch211-137a8.4
5.65263e-295	0.473843	0.393	0.165	1.3369e-290	Retina neurogenesis	CU457819.3
2.54004e-294	0.383092	0.572	0.297	6.00745e-290	Retina neurogenesis	eif4e1c
2.19497e-293	0.34114	0.999	0.993	5.19133e-289	Retina neurogenesis	rps9
2.98431e-292	0.553697	0.366	0.15	7.0582e-288	Retina neurogenesis	mcm2
3.60406e-291	0.290046	0.306	0.108	8.52396e-287	Retina neurogenesis	crb2a
3.86217e-289	0.590387	0.465	0.226	9.13441e-285	Retina neurogenesis	dkc1
2.02129e-287	0.309061	0.995	0.988	4.78054e-283	Retina neurogenesis	rpl27
1.193e-284	0.571237	0.763	0.544	2.82156e-280	Retina neurogenesis	nap1l1
1.90038e-284	0.575547	0.478	0.23	4.49459e-280	Retina neurogenesis	ephb2b
2.16921e-284	0.449288	0.585	0.331	5.13039e-280	Retina neurogenesis	uck2b
3.23073e-284	0.98535	0.57	0.317	7.64099e-280	Retina neurogenesis	nusap1
2.12718e-282	0.301337	0.37	0.147	5.031e-278	Retina neurogenesis	larp4ab
3.40702e-282	0.296794	0.995	0.99	8.05794e-278	Retina neurogenesis	rack1
8.19307e-281	0.46115	0.393	0.169	1.93774e-276	Retina neurogenesis	hist1h2a11.1
1.19625e-280	0.299912	0.997	0.995	2.82925e-276	Retina neurogenesis	rps27a
6.47644e-280	0.330688	0.998	0.994	1.53174e-275	Retina neurogenesis	rpl23
8.99291e-280	0.301428	0.378	0.158	2.12691e-275	Retina neurogenesis	thap12a
6.57433e-279	0.30241	0.998	0.994	1.5549e-274	Retina neurogenesis	rpl21
5.19478e-278	0.558522	0.677	0.427	1.22862e-273	Retina neurogenesis	ctcf
5.9082e-278	0.494466	0.517	0.267	1.39735e-273	Retina neurogenesis	btg3
7.27684e-278	0.292369	0.32	0.122	1.72105e-273	Retina neurogenesis	tomm20a
8.31477e-277	0.360945	0.996	0.991	1.96653e-272	Retina neurogenesis	rps2
1.73866e-276	0.308006	0.415	0.174	4.1121e-272	Retina neurogenesis	itm2cb
2.52929e-275	0.378398	0.582	0.32	5.98202e-271	Retina neurogenesis	kpnb1
3.29052e-275	0.480388	0.548	0.292	7.78242e-271	Retina neurogenesis	ssrp1a
4.81485e-275	0.464563	0.504	0.253	1.13876e-270	Retina neurogenesis	znf516
2.23805e-274	0.402026	0.966	0.921	5.29321e-270	Retina neurogenesis	ran
2.04106e-272	0.570932	0.474	0.238	4.82731e-268	Retina neurogenesis	hist1h4l.2
1.02535e-270	0.559044	0.501	0.254	2.42506e-266	Retina neurogenesis	ccna2
2.69221e-270	0.856559	0.542	0.299	6.36734e-266	Retina neurogenesis	hist2h3c
5.53804e-270	0.672018	0.465	0.231	1.3098e-265	Retina neurogenesis	hist1h2a5
1.09282e-269	0.471906	0.623	0.378	2.58463e-265	Retina neurogenesis	nutf2l
1.30836e-267	0.510333	0.462	0.229	3.09439e-263	Retina neurogenesis	fbl
9.63265e-267	0.35627	0.323	0.124	2.27822e-262	Retina neurogenesis	pclaf
1.89794e-266	0.451196	0.471	0.233	4.48882e-262	Retina neurogenesis	uhrf1
3.69555e-266	1.05359	0.487	0.256	8.74036e-262	Retina neurogenesis	si:ch211-113a14.24
5.05379e-266	0.301471	0.303	0.114	1.19527e-261	Retina neurogenesis	CR762436.1
8.80304e-266	0.624208	0.931	0.84	2.08201e-261	Retina neurogenesis	hmgb2b
1.83969e-265	0.474764	0.408	0.185	4.35105e-261	Retina neurogenesis	hist1h2a2
6.92921e-264	0.289316	0.997	0.994	1.63883e-259	Retina neurogenesis	rps14
7.29455e-264	1.10871	0.543	0.301	1.72523e-259	Retina neurogenesis	zgc:153405
1.19315e-263	0.455556	0.245	0.079	2.82193e-259	Retina neurogenesis	foxd1
5.4457e-262	0.381089	0.365	0.156	1.28796e-257	Retina neurogenesis	hist1h4l.15
1.2057e-261	0.46937	0.43	0.204	2.85159e-257	Retina neurogenesis	FP325123.1
1.36593e-261	0.495125	0.451	0.221	3.23056e-257	Retina neurogenesis	hist1h4l.3
2.27621e-261	0.310374	0.996	0.989	5.38346e-257	Retina neurogenesis	rps4x
5.12517e-261	0.334581	0.324	0.125	1.21216e-256	Retina neurogenesis	cdk6
5.90914e-261	0.311756	0.253	0.085	1.39757e-256	Retina neurogenesis	mcm3
1.19417e-260	0.644571	0.48	0.248	2.82433e-256	Retina neurogenesis	hist1h2a11.2
1.50542e-260	0.326931	0.991	0.979	3.56046e-256	Retina neurogenesis	rps6
1.20169e-259	1.09311	0.58	0.341	2.84212e-255	Retina neurogenesis	si:ch211-113a14.18
2.16719e-259	0.692298	0.5	0.263	5.12563e-255	Retina neurogenesis	si:dkey-108k21.19
1.38632e-257	0.348772	0.399	0.178	3.27878e-253	Retina neurogenesis	knl1
2.36879e-257	0.693174	0.51	0.278	5.60243e-253	Retina neurogenesis	nop58
5.15101e-257	0.302757	0.421	0.196	1.21827e-252	Retina neurogenesis	rpa1
9.84257e-257	0.819195	0.535	0.284	2.32787e-252	Retina neurogenesis	cenpf
5.63514e-255	0.356483	0.462	0.229	1.33277e-250	Retina neurogenesis	rnaseh2a
8.00443e-255	0.75459	0.52	0.285	1.89313e-250	Retina neurogenesis	CU459186.2
5.56174e-254	0.349604	0.523	0.27	1.31541e-249	Retina neurogenesis	prim2
7.72008e-254	0.389299	0.107	0.018	1.82588e-249	Retina neurogenesis	lhx4
1.13524e-253	0.608879	0.449	0.225	2.68496e-249	Retina neurogenesis	si:ch1073-153i20.5
2.90657e-253	0.367538	0.369	0.161	6.87432e-249	Retina neurogenesis	CU457819.2
3.93415e-253	0.535511	0.454	0.222	9.30467e-249	Retina neurogenesis	CU459186.5
2.47641e-251	0.340664	0.377	0.169	5.85696e-247	Retina neurogenesis	mrpl12
1.12461e-250	0.598674	0.431	0.212	2.65981e-246	Retina neurogenesis	hist1h4l.1
1.5187e-250	0.466581	0.366	0.163	3.59189e-246	Retina neurogenesis	nop2
1.77784e-250	0.442595	0.541	0.273	4.20477e-246	Retina neurogenesis	celsr1b
3.54714e-250	0.281223	0.998	0.995	8.38934e-246	Retina neurogenesis	rps5
9.72008e-250	0.303947	0.994	0.983	2.2989e-245	Retina neurogenesis	rpl30
3.53849e-249	0.37879	0.483	0.251	8.36889e-245	Retina neurogenesis	rfc3
6.45672e-249	0.282774	0.995	0.989	1.52708e-244	Retina neurogenesis	rps11
1.65311e-248	0.281167	0.394	0.177	3.90976e-244	Retina neurogenesis	fam117aa
3.8152e-248	1.38329	0.754	0.555	9.02334e-244	Retina neurogenesis	hist1h4l.11
1.11336e-247	0.465325	0.443	0.21	2.6332e-243	Retina neurogenesis	cks2
1.31372e-247	0.336389	0.519	0.267	3.10709e-243	Retina neurogenesis	tfdp2
6.061e-246	0.684884	0.49	0.262	1.43349e-241	Retina neurogenesis	hist1h4l.9
3.16762e-245	0.281081	0.453	0.209	7.49174e-241	Retina neurogenesis	si:ch211-284f22.3
2.63019e-244	0.343568	0.465	0.235	6.22066e-240	Retina neurogenesis	paxip1
7.73076e-244	0.442442	0.885	0.799	1.8284e-239	Retina neurogenesis	mibp2
5.10199e-243	0.431417	0.668	0.426	1.20667e-238	Retina neurogenesis	brdt
2.46561e-241	0.280686	0.996	0.992	5.83141e-237	Retina neurogenesis	rpl24
8.75469e-241	0.399183	0.509	0.263	2.07057e-236	Retina neurogenesis	smc2
1.03565e-240	0.375041	0.378	0.172	2.44942e-236	Retina neurogenesis	zgc:173552.1
2.04668e-240	0.608548	0.56	0.308	4.8406e-236	Retina neurogenesis	tpx2
2.19751e-240	0.284703	0.996	0.991	5.19733e-236	Retina neurogenesis	rpl9
7.11581e-240	0.521653	0.638	0.383	1.68296e-235	Retina neurogenesis	abcf1
1.76549e-239	0.323044	0.349	0.151	4.17557e-235	Retina neurogenesis	FP325123.2
3.73909e-239	0.492729	0.406	0.193	8.84331e-235	Retina neurogenesis	si:ch1073-159d7.7
5.13434e-239	0.431303	0.766	0.566	1.21432e-234	Retina neurogenesis	atp5mc1
7.30536e-239	0.425556	0.532	0.299	1.72779e-234	Retina neurogenesis	kpnb3
8.00828e-239	0.492135	0.431	0.211	1.89404e-234	Retina neurogenesis	ano9a.1
3.03635e-238	0.871671	0.527	0.304	7.18128e-234	Retina neurogenesis	hist1h2a10
3.0991e-238	1.24244	0.642	0.422	7.32967e-234	Retina neurogenesis	si:dkey-108k21.10
1.00504e-237	0.489749	0.437	0.211	2.37702e-233	Retina neurogenesis	dhx32b
1.55019e-235	0.281372	0.469	0.237	3.66635e-231	Retina neurogenesis	zfx
1.76892e-235	0.891462	0.545	0.311	4.18368e-231	Retina neurogenesis	hist1h4l.14
2.96272e-235	0.364192	0.364	0.164	7.00713e-231	Retina neurogenesis	zgc:171759.1
6.53363e-235	0.501362	0.366	0.166	1.54527e-230	Retina neurogenesis	si:ch211-113a14.19.4
8.98223e-235	1.03499	0.789	0.622	2.12439e-230	Retina neurogenesis	hist1h4l.6
1.14484e-234	0.352045	0.351	0.155	2.70766e-230	Retina neurogenesis	si:dkey-108k21.11
2.49507e-234	0.322551	0.986	0.969	5.9011e-230	Retina neurogenesis	rps3
2.56804e-234	0.989453	0.573	0.34	6.07367e-230	Retina neurogenesis	hist1h2a3.1
1.56685e-233	0.489621	0.413	0.202	3.70575e-229	Retina neurogenesis	zgc:173552.2
1.66217e-233	0.287017	0.332	0.14	3.93119e-229	Retina neurogenesis	zgc:112234.9
1.24698e-232	0.445196	0.587	0.347	2.94923e-228	Retina neurogenesis	foxo4
3.18952e-232	0.793397	0.543	0.309	7.54354e-228	Retina neurogenesis	mibp
3.40718e-232	0.282149	0.999	0.996	8.05831e-228	Retina neurogenesis	rpl13
3.7116e-232	0.298243	0.998	0.995	8.77831e-228	Retina neurogenesis	rps12
4.20942e-232	0.562598	0.429	0.214	9.9557e-228	Retina neurogenesis	hist1h2a11.4
4.57191e-232	0.503229	0.778	0.576	1.0813e-227	Retina neurogenesis	ranbp1
1.07508e-230	0.477078	0.429	0.213	2.54267e-226	Retina neurogenesis	hist1h2a3.4
2.41509e-230	0.490587	0.643	0.386	5.71194e-226	Retina neurogenesis	chaf1a
5.71599e-230	0.48154	0.388	0.187	1.35189e-225	Retina neurogenesis	mcm4
6.8467e-230	0.407109	0.52	0.279	1.61931e-225	Retina neurogenesis	cks1b
7.28243e-230	0.720071	0.469	0.251	1.72237e-225	Retina neurogenesis	FQ312024.1
1.24111e-229	0.505093	0.387	0.191	2.93535e-225	Retina neurogenesis	cad
1.60217e-229	0.474879	0.434	0.216	3.7893e-225	Retina neurogenesis	CU459186.3
2.45002e-229	0.631108	0.471	0.252	5.79454e-225	Retina neurogenesis	si:ch211-113a14.19
4.83509e-229	0.491638	0.611	0.347	1.14355e-224	Retina neurogenesis	sox2
5.61633e-229	0.700292	0.982	0.97	1.32832e-224	Retina neurogenesis	hmgn2
1.00259e-228	0.396979	0.385	0.18	2.37123e-224	Retina neurogenesis	hist1h4l.17
1.8473e-228	0.777414	0.515	0.291	4.36905e-224	Retina neurogenesis	FP236630.1
1.88683e-228	0.786424	0.554	0.33	4.46253e-224	Retina neurogenesis	zgc:173552
2.17714e-228	0.464589	0.424	0.211	5.14915e-224	Retina neurogenesis	CU457819.5
2.71672e-228	0.297554	0.358	0.159	6.42531e-224	Retina neurogenesis	zgc:112234.3
3.03208e-228	0.293041	0.999	0.994	7.17117e-224	Retina neurogenesis	rplp2l
4.0407e-228	0.322442	0.386	0.177	9.55666e-224	Retina neurogenesis	si:ch211-113a14.22.2
6.69408e-228	0.442253	0.399	0.194	1.58322e-223	Retina neurogenesis	zgc:112234.7
8.86289e-228	0.447998	0.395	0.188	2.09616e-223	Retina neurogenesis	si:ch211-113a14.19.1
2.05534e-227	1.0243	0.631	0.417	4.86109e-223	Retina neurogenesis	hist1h2a6
4.06346e-227	0.407361	0.595	0.337	9.61049e-223	Retina neurogenesis	ctnnd2b
5.27642e-227	0.409504	0.495	0.27	1.24793e-222	Retina neurogenesis	rpa3
6.29919e-227	0.729403	0.519	0.294	1.48982e-222	Retina neurogenesis	CU457819.1
1.34467e-225	1.09518	0.54	0.323	3.18029e-221	Retina neurogenesis	si:dkey-261m9.12
1.81827e-225	0.713869	0.191	0.058	4.30039e-221	Retina neurogenesis	olig2
1.42827e-224	0.360849	0.375	0.174	3.378e-220	Retina neurogenesis	zgc:112234.5
5.31361e-223	0.419185	0.56	0.313	1.25672e-218	Retina neurogenesis	cdc25b
7.1829e-223	0.979437	0.551	0.336	1.69883e-218	Retina neurogenesis	si:ch211-113a14.19.2
2.6704e-222	0.377328	0.967	0.921	6.31577e-218	Retina neurogenesis	rpl22l1
1.04729e-221	0.302738	0.359	0.166	2.47696e-217	Retina neurogenesis	gar1
1.8065e-221	0.334491	0.982	0.965	4.27254e-217	Retina neurogenesis	eef2b
2.08471e-221	0.941719	0.563	0.349	4.93055e-217	Retina neurogenesis	hist1h4l.10
4.87656e-221	0.59975	0.526	0.289	1.15336e-216	Retina neurogenesis	top2a
4.15892e-220	0.283279	0.413	0.202	9.83627e-216	Retina neurogenesis	ivns1abpb
4.42166e-220	0.299937	0.407	0.194	1.04577e-215	Retina neurogenesis	ckap2l
9.01774e-220	0.296616	0.357	0.163	2.13279e-215	Retina neurogenesis	wdr76
1.04757e-219	0.508837	0.412	0.204	2.47761e-215	Retina neurogenesis	hist1h2a10.1
1.27074e-219	0.322069	0.995	0.982	3.00542e-215	Retina neurogenesis	rpl10a
3.4696e-219	0.674075	0.49	0.267	8.20596e-215	Retina neurogenesis	hist1h2a11.3
9.67575e-219	0.297679	0.998	0.994	2.28841e-214	Retina neurogenesis	rpl36a
1.23822e-218	0.278909	0.997	0.992	2.92851e-214	Retina neurogenesis	rpl18a
2.00389e-218	0.355912	0.244	0.089	4.7394e-214	Retina neurogenesis	slc29a2
6.33334e-218	0.366974	0.421	0.204	1.4979e-213	Retina neurogenesis	mycb
1.86839e-217	0.51454	0.936	0.845	4.41893e-213	Retina neurogenesis	si:ch73-281n10.2
3.05381e-217	1.07595	0.6	0.387	7.22256e-213	Retina neurogenesis	si:ch211-113a14.12
1.88855e-216	0.511716	0.402	0.196	4.46662e-212	Retina neurogenesis	mycla
2.74019e-215	0.700262	0.972	0.95	6.48082e-211	Retina neurogenesis	h3f3b.1
3.47541e-215	0.291594	0.286	0.115	8.2197e-211	Retina neurogenesis	si:ch73-368j24.12
8.7342e-215	0.361991	0.505	0.272	2.06573e-210	Retina neurogenesis	smc4
1.08334e-214	0.56418	0.715	0.482	2.5622e-210	Retina neurogenesis	stmn1a
6.48087e-214	0.385122	0.629	0.407	1.53279e-209	Retina neurogenesis	abce1
4.57617e-213	0.989948	0.525	0.311	1.08231e-208	Retina neurogenesis	si:dkey-108k21.21
1.00245e-212	0.477016	0.416	0.207	2.37088e-208	Retina neurogenesis	g2e3
4.75321e-211	0.679326	0.478	0.265	1.12418e-206	Retina neurogenesis	si:ch73-368j24.11
2.76418e-210	1.17304	0.303	0.131	6.53755e-206	Retina neurogenesis	fabp11a
3.11941e-210	0.354742	0.617	0.378	7.37772e-206	Retina neurogenesis	prelid3b
5.73736e-210	0.472254	0.466	0.261	1.35694e-205	Retina neurogenesis	c1qbp
1.63938e-209	0.291579	0.995	0.986	3.8773e-205	Retina neurogenesis	rpl15
1.69084e-209	0.296262	0.465	0.24	3.99901e-205	Retina neurogenesis	cdca5
2.31468e-209	0.485279	0.443	0.229	5.47446e-205	Retina neurogenesis	zgc:171759.4
2.95831e-209	0.597086	0.467	0.253	6.9967e-205	Retina neurogenesis	CU302436.1
3.76292e-209	0.771485	0.556	0.333	8.89969e-205	Retina neurogenesis	zgc:173552.7
6.52305e-209	0.35574	0.362	0.17	1.54277e-204	Retina neurogenesis	hist1h2ba
1.07398e-208	0.375326	0.39	0.191	2.54006e-204	Retina neurogenesis	zgc:171759.3
1.14953e-208	0.280886	0.997	0.99	2.71876e-204	Retina neurogenesis	rpl35a
1.23824e-206	0.504098	0.455	0.241	2.92855e-202	Retina neurogenesis	hist1h2a3
6.4328e-206	0.621714	0.688	0.486	1.52142e-201	Retina neurogenesis	nop56
1.87537e-205	0.285559	0.374	0.177	4.43545e-201	Retina neurogenesis	kif22
3.22038e-205	0.662039	0.481	0.268	7.61652e-201	Retina neurogenesis	hist1h2a1
9.50759e-205	0.409104	0.839	0.713	2.24864e-200	Retina neurogenesis	cox5aa
2.46001e-204	0.53423	0.432	0.221	5.81818e-200	Retina neurogenesis	hist1h2a3.3
3.03588e-204	1.10086	0.296	0.132	7.18015e-200	Retina neurogenesis	otx2b
7.1852e-204	0.822928	0.447	0.242	1.69937e-199	Retina neurogenesis	im:7152348
1.05123e-203	0.412102	0.581	0.345	2.48625e-199	Retina neurogenesis	dut
1.62143e-203	0.687827	0.781	0.604	3.83484e-199	Retina neurogenesis	mex3b
2.7746e-202	0.303753	0.549	0.309	6.56221e-198	Retina neurogenesis	smarca5
9.53688e-202	0.473013	0.381	0.189	2.25557e-197	Retina neurogenesis	si:ch211-113a14.19.3
1.89647e-200	0.294292	0.994	0.977	4.48534e-196	Retina neurogenesis	rpl23a
4.45242e-200	0.319291	0.265	0.107	1.05304e-195	Retina neurogenesis	C5H12orf65
1.02331e-197	0.411794	0.39	0.195	2.42023e-193	Retina neurogenesis	hist1h4l.8
2.14474e-197	0.307711	0.561	0.318	5.07253e-193	Retina neurogenesis	phf20b
2.24426e-197	0.276159	0.589	0.357	5.30789e-193	Retina neurogenesis	cox7a2l
6.21639e-197	0.368696	0.414	0.208	1.47024e-192	Retina neurogenesis	si:dkey-23a13.21
2.98433e-196	0.527251	0.723	0.55	7.05825e-192	Retina neurogenesis	cnbpa
4.47283e-196	0.297044	0.976	0.948	1.05787e-191	Retina neurogenesis	rps17
4.92226e-196	0.479228	0.535	0.301	1.16416e-191	Retina neurogenesis	CABZ01058261.1
5.47423e-196	0.281962	0.343	0.157	1.29471e-191	Retina neurogenesis	raver1
9.78051e-196	0.408414	0.385	0.191	2.31319e-191	Retina neurogenesis	si:dkey-108k21.14
1.20352e-194	0.526294	0.438	0.234	2.84644e-190	Retina neurogenesis	si:dkey-23a13.17
1.40597e-194	0.368705	0.554	0.334	3.32526e-190	Retina neurogenesis	etf1b
6.37426e-194	0.323347	0.249	0.097	1.50758e-189	Retina neurogenesis	cdca7a
6.79612e-194	0.672965	0.461	0.249	1.60735e-189	Retina neurogenesis	aspm
7.89636e-194	0.637828	0.776	0.641	1.86757e-189	Retina neurogenesis	tuba8l4
1.44869e-193	0.326186	0.611	0.38	3.4263e-189	Retina neurogenesis	usp10
2.84124e-193	0.435835	0.375	0.184	6.71981e-189	Retina neurogenesis	sgk1
3.27763e-193	0.279878	0.996	0.991	7.75193e-189	Retina neurogenesis	rps15a
8.76655e-193	0.293432	0.327	0.148	2.07338e-188	Retina neurogenesis	gnl3
2.55604e-192	0.290807	0.357	0.168	6.04529e-188	Retina neurogenesis	anln
8.57271e-192	0.763247	0.532	0.318	2.02753e-187	Retina neurogenesis	si:ch1073-153i20.4
2.66048e-191	0.44421	0.454	0.239	6.29229e-187	Retina neurogenesis	kifc1
3.13983e-190	0.365078	0.346	0.164	7.42602e-186	Retina neurogenesis	hist1h2a3.2
1.20262e-189	0.355199	0.983	0.965	2.84431e-185	Retina neurogenesis	nme2b.1
4.23743e-189	0.55292	0.696	0.47	1.0022e-184	Retina neurogenesis	akap12b
9.25917e-189	0.344508	0.894	0.814	2.18989e-184	Retina neurogenesis	slc25a3b
5.29244e-188	0.35099	0.354	0.171	1.25171e-183	Retina neurogenesis	H3C11
1.94897e-187	0.440455	0.644	0.434	4.60952e-183	Retina neurogenesis	sumo3b
2.3993e-187	0.468609	0.673	0.467	5.67458e-183	Retina neurogenesis	anp32b
3.25716e-187	0.331357	0.556	0.325	7.70351e-183	Retina neurogenesis	dusp1
5.70305e-187	0.317581	0.491	0.27	1.34883e-182	Retina neurogenesis	slc38a4
1.80863e-186	0.377233	0.874	0.767	4.27759e-182	Retina neurogenesis	cnbpb
2.04989e-186	0.284356	0.974	0.954	4.8482e-182	Retina neurogenesis	ppiab
5.55796e-186	0.448455	0.632	0.41	1.31451e-181	Retina neurogenesis	baz1b
1.35645e-185	0.480805	0.525	0.301	3.20815e-181	Retina neurogenesis	aurkb
2.62325e-185	0.716303	0.47	0.269	6.20426e-181	Retina neurogenesis	si:ch73-36p18.1
3.3634e-185	0.671562	0.52	0.306	7.95477e-181	Retina neurogenesis	zgc:113983
7.40661e-185	0.419626	0.483	0.268	1.75174e-180	Retina neurogenesis	rassf1
3.80261e-183	0.289335	0.406	0.209	8.99356e-179	Retina neurogenesis	hirip3
4.22607e-183	0.474375	0.557	0.323	9.99508e-179	Retina neurogenesis	dlgap5
4.05095e-182	0.404865	0.595	0.383	9.5809e-178	Retina neurogenesis	supt16h
4.20972e-180	0.474225	0.623	0.423	9.95641e-176	Retina neurogenesis	banf1
1.03797e-179	0.369815	0.954	0.911	2.45491e-175	Retina neurogenesis	rpl4
2.85311e-179	0.493884	0.541	0.313	6.74789e-175	Retina neurogenesis	plk1
6.01617e-179	0.32385	0.478	0.278	1.42288e-174	Retina neurogenesis	lyar
5.01672e-178	0.454028	0.35	0.171	1.18651e-173	Retina neurogenesis	ccnb3
2.45693e-175	0.439854	0.663	0.462	5.81088e-171	Retina neurogenesis	selenoh
7.2798e-175	0.287876	0.581	0.354	1.72175e-170	Retina neurogenesis	phc2a
6.39922e-174	0.652494	0.747	0.577	1.51348e-169	Retina neurogenesis	ccng1
3.19583e-173	0.282525	0.554	0.33	7.55846e-169	Retina neurogenesis	srrt
4.76225e-173	0.342613	0.969	0.942	1.12632e-168	Retina neurogenesis	serbp1a
3.24318e-172	0.818887	0.612	0.426	7.67045e-168	Retina neurogenesis	zgc:194989
2.30319e-171	0.312145	0.34	0.165	5.44729e-167	Retina neurogenesis	hist1h4l.23
2.99436e-171	0.530576	0.482	0.3	7.08195e-167	Retina neurogenesis	snu13b
1.72812e-170	0.305099	0.366	0.182	4.08717e-166	Retina neurogenesis	kif20a
5.07559e-170	0.295153	0.538	0.315	1.20043e-165	Retina neurogenesis	rimkla
1.84562e-169	0.439383	0.747	0.607	4.36507e-165	Retina neurogenesis	atp5pf
1.97176e-169	0.327265	0.688	0.481	4.66342e-165	Retina neurogenesis	mphosph8
8.06776e-168	0.31761	0.967	0.932	1.9081e-163	Retina neurogenesis	rpl5a
1.18602e-167	0.279625	0.373	0.188	2.80507e-163	Retina neurogenesis	kif23
1.91253e-167	0.282879	0.419	0.225	4.52333e-163	Retina neurogenesis	pcnt
2.92073e-167	0.577014	0.67	0.474	6.90782e-163	Retina neurogenesis	mxd3
4.70384e-166	0.27715	0.526	0.315	1.11251e-161	Retina neurogenesis	hat1
6.81032e-166	0.444234	0.574	0.362	1.61071e-161	Retina neurogenesis	tuba1b
2.38486e-165	0.364295	0.779	0.567	5.64043e-161	Retina neurogenesis	nfil3-5
3.97241e-163	0.379448	0.795	0.65	9.39515e-159	Retina neurogenesis	ddx39ab
4.39096e-163	0.531321	0.465	0.293	1.03851e-158	Retina neurogenesis	pa2g4a
9.31547e-163	0.345578	0.756	0.549	2.2032e-158	Retina neurogenesis	ak2
1.02294e-162	0.386189	0.872	0.755	2.41937e-158	Retina neurogenesis	anp32a
2.35035e-159	0.285302	0.422	0.239	5.55882e-155	Retina neurogenesis	bxdc2
2.49699e-159	0.318461	0.496	0.304	5.90562e-155	Retina neurogenesis	bysl
4.25006e-159	0.288492	0.562	0.336	1.00518e-154	Retina neurogenesis	rcor2
2.96995e-158	0.925685	0.742	0.578	7.02423e-154	Retina neurogenesis	zgc:173552.3
1.00386e-156	0.414807	0.826	0.672	2.37424e-152	Retina neurogenesis	h2az2a
5.30767e-156	0.314222	0.334	0.168	1.25532e-151	Retina neurogenesis	zgc:163061.1
3.73159e-155	0.502349	0.473	0.274	8.82557e-151	Retina neurogenesis	si:ch211-113a14.11
7.85746e-155	0.277065	0.358	0.184	1.85837e-150	Retina neurogenesis	TUBB4B
3.93613e-153	0.337633	0.41	0.222	9.30933e-149	Retina neurogenesis	CR762436.2
4.51721e-152	0.955371	0.934	0.884	1.06836e-147	Retina neurogenesis	zgc:153409
2.49876e-151	0.326335	0.878	0.784	5.90982e-147	Retina neurogenesis	atp5fa1
1.21793e-150	0.281747	0.678	0.465	2.88052e-146	Retina neurogenesis	eif4a1a
2.23477e-150	0.382937	0.839	0.701	5.28545e-146	Retina neurogenesis	hnrnpa1b
1.88934e-149	0.286799	0.564	0.354	4.46847e-145	Retina neurogenesis	ppm1g
8.68994e-149	0.350157	0.374	0.203	2.05526e-144	Retina neurogenesis	nhsl2
5.95108e-148	0.498366	0.596	0.412	1.40749e-143	Retina neurogenesis	si:dkey-239h2.3
1.87477e-147	0.379207	0.472	0.294	4.43402e-143	Retina neurogenesis	nop10
2.84495e-147	0.595058	0.547	0.363	6.7286e-143	Retina neurogenesis	zgc:173587
4.00961e-147	0.296647	0.634	0.437	9.48312e-143	Retina neurogenesis	hint1
7.24866e-147	0.326067	0.778	0.634	1.71438e-142	Retina neurogenesis	atp5f1d
1.3753e-146	0.311472	0.666	0.455	3.25272e-142	Retina neurogenesis	ppig
6.20353e-144	0.283403	0.631	0.415	1.4672e-139	Retina neurogenesis	polr2a
1.24216e-143	0.305904	0.365	0.189	2.93783e-139	Retina neurogenesis	cdk1
1.26011e-143	0.298042	0.408	0.222	2.98029e-139	Retina neurogenesis	cenpe
2.0703e-143	0.287357	0.664	0.449	4.89647e-139	Retina neurogenesis	slc38a2
1.10688e-141	0.326161	0.515	0.312	2.61789e-137	Retina neurogenesis	pim1
4.25371e-139	0.310032	0.705	0.515	1.00605e-134	Retina neurogenesis	eef1da
1.28413e-138	0.358036	0.712	0.537	3.0371e-134	Retina neurogenesis	eif4bb
1.76729e-138	0.28576	0.627	0.433	4.17981e-134	Retina neurogenesis	gspt1l
5.05605e-138	0.424814	0.871	0.758	1.19581e-133	Retina neurogenesis	TXN
4.90585e-137	0.352208	0.165	0.061	1.16028e-132	Retina neurogenesis	cyp26c1
8.43417e-137	0.324011	0.716	0.552	1.99477e-132	Retina neurogenesis	srsf2a
1.30384e-135	0.414541	0.605	0.402	3.0837e-131	Retina neurogenesis	tp53
2.79442e-135	0.343286	0.563	0.368	6.60907e-131	Retina neurogenesis	bub3
1.05594e-134	0.355211	0.708	0.506	2.49739e-130	Retina neurogenesis	slc7a3a
2.47657e-134	0.32785	0.277	0.135	5.85733e-130	Retina neurogenesis	prc1a
2.73264e-134	0.330387	0.885	0.815	6.46297e-130	Retina neurogenesis	atp5f1b
3.39865e-134	0.279926	0.288	0.143	8.03814e-130	Retina neurogenesis	prc1b
5.02191e-133	0.299183	0.441	0.267	1.18773e-128	Retina neurogenesis	wdr43
2.16358e-132	0.320289	0.827	0.703	5.11709e-128	Retina neurogenesis	cct4
7.85435e-131	0.31573	0.495	0.327	1.85763e-126	Retina neurogenesis	MYG1
9.65951e-131	0.961532	0.639	0.484	2.28457e-126	Retina neurogenesis	zgc:110425
2.83564e-130	0.350475	0.397	0.222	6.70658e-126	Retina neurogenesis	ccnb1
5.23178e-129	0.709906	0.378	0.215	1.23737e-124	Retina neurogenesis	si:ch211-69g19.2
2.02857e-128	0.374655	0.456	0.267	4.79777e-124	Retina neurogenesis	cdc20
1.17612e-126	0.327187	0.723	0.515	2.78164e-122	Retina neurogenesis	tmem35
5.13304e-124	0.286199	0.845	0.74	1.21402e-119	Retina neurogenesis	eif2s1b
5.54127e-124	0.295226	0.849	0.739	1.31057e-119	Retina neurogenesis	cct5
6.81098e-124	0.36024	0.538	0.368	1.61087e-119	Retina neurogenesis	rsl1d1
2.54109e-123	0.285861	0.858	0.774	6.00993e-119	Retina neurogenesis	eif3ba
2.84527e-122	0.283486	0.412	0.237	6.72934e-118	Retina neurogenesis	tacc3
2.91232e-122	0.297499	0.967	0.942	6.88794e-118	Retina neurogenesis	rpl6
1.3085e-121	0.324333	0.809	0.664	3.09473e-117	Retina neurogenesis	rad21a
6.98077e-120	0.349656	0.39	0.223	1.65102e-115	Retina neurogenesis	ube2c
2.5978e-119	0.364811	0.743	0.551	6.14405e-115	Retina neurogenesis	top1l
3.21913e-119	0.282806	0.831	0.715	7.61357e-115	Retina neurogenesis	eif3k
3.6541e-119	0.300082	0.95	0.91	8.64231e-115	Retina neurogenesis	h2az2b
2.45062e-118	0.326393	0.401	0.24	5.79596e-114	Retina neurogenesis	scml2
2.65752e-118	0.338337	0.782	0.671	6.2853e-114	Retina neurogenesis	atp5pd
4.28972e-117	0.554511	0.909	0.878	1.01456e-112	Retina neurogenesis	tubb2b
5.50171e-117	0.298106	0.6	0.413	1.30121e-112	Retina neurogenesis	eif4g1a
1.48505e-116	0.291819	0.835	0.716	3.51229e-112	Retina neurogenesis	idh2
2.81088e-116	0.312824	0.814	0.67	6.648e-112	Retina neurogenesis	snrpd1
3.66934e-116	0.279078	0.845	0.724	8.67835e-112	Retina neurogenesis	eif3d
2.07741e-115	0.358121	0.471	0.299	4.91327e-111	Retina neurogenesis	FP236812.1
3.6125e-115	0.300381	0.327	0.178	8.54393e-111	Retina neurogenesis	aurka
3.05124e-114	0.292591	0.321	0.179	7.21649e-110	Retina neurogenesis	bms1
2.88127e-110	0.424032	0.548	0.383	6.81449e-106	Retina neurogenesis	elmsan1b
2.96622e-110	0.284198	0.805	0.688	7.01541e-106	Retina neurogenesis	atp5po
4.50448e-110	0.282562	0.36	0.203	1.06536e-105	Retina neurogenesis	kif11
1.96257e-108	0.369207	0.527	0.348	4.64167e-104	Retina neurogenesis	cdc14b
1.36956e-106	0.76402	0.459	0.322	3.23916e-102	Retina neurogenesis	npm1a
2.00992e-106	0.288715	0.834	0.693	4.75365e-102	Retina neurogenesis	hnrnpabb
7.79632e-106	0.870584	0.483	0.347	1.84391e-101	Retina neurogenesis	insm1a
1.16002e-105	0.297838	0.929	0.86	2.74356e-101	Retina neurogenesis	hnrnpa0b
3.03333e-105	0.328759	0.604	0.44	7.17413e-101	Retina neurogenesis	pdap1a
1.68598e-104	0.311021	0.732	0.571	3.98752e-100	Retina neurogenesis	rbbp6
3.987e-104	0.323306	0.674	0.52	9.42964e-100	Retina neurogenesis	ipo7
1.02072e-103	0.291152	0.351	0.209	2.41411e-99	Retina neurogenesis	ssb
1.20972e-103	0.351917	0.842	0.729	2.86111e-99	Retina neurogenesis	snrpb
3.70527e-103	0.320757	0.709	0.542	8.76334e-99	Retina neurogenesis	brd2a
1.34362e-102	0.281767	0.812	0.691	3.17781e-98	Retina neurogenesis	eif3ha
7.31634e-101	0.39781	0.637	0.462	1.73039e-96	Retina neurogenesis	tuba8l
7.95968e-100	0.305355	0.855	0.754	1.88254e-95	Retina neurogenesis	atf4a
1.18711e-95	0.292752	0.615	0.448	2.80764e-91	Retina neurogenesis	isg20
4.52162e-94	0.338724	0.245	0.13	1.06941e-89	Retina neurogenesis	fosl1a
9.49743e-94	0.290771	0.381	0.242	2.24624e-89	Retina neurogenesis	ddx18
9.09684e-89	0.381331	0.303	0.176	2.15149e-84	Retina neurogenesis	fosl2
2.68716e-86	0.386924	0.639	0.491	6.3554e-82	Retina neurogenesis	tp53inp1
5.4428e-82	0.291377	0.449	0.319	1.28728e-77	Retina neurogenesis	eif6
2.14932e-80	0.282329	0.816	0.703	5.08335e-76	Retina neurogenesis	setb
2.58353e-80	0.291253	0.717	0.586	6.11031e-76	Retina neurogenesis	tma7
1.52619e-71	0.393159	0.584	0.476	3.60959e-67	Retina neurogenesis	atp5if1a
1.3989e-70	0.33312	0.825	0.716	3.30854e-66	Retina neurogenesis	eif5a2
4.15586e-66	0.301507	0.3	0.184	9.82901e-62	Retina neurogenesis	kpna2
6.48751e-61	0.33578	0.954	0.918	1.53436e-56	Retina neurogenesis	tubb4b
2.68778e-59	0.353449	0.118	0.056	6.35686e-55	Retina neurogenesis	thrb
6.89641e-58	0.564061	0.795	0.685	1.63107e-53	Retina neurogenesis	atf3
1.14915e-56	0.415576	0.798	0.703	2.71786e-52	Retina neurogenesis	ncl
1.55667e-54	0.587427	0.115	0.055	3.68167e-50	Retina neurogenesis	cdkn1cb
2.78885e-52	0.595234	0.204	0.126	6.5959e-48	Retina neurogenesis	prox1a
6.6619e-47	0.341627	0.186	0.11	1.5756e-42	Retina neurogenesis	tspan36
4.15704e-46	0.746324	0.219	0.136	9.83182e-42	Retina neurogenesis	cxcr4b
3.08853e-43	0.520844	0.791	0.721	7.30468e-39	Retina neurogenesis	histh1l
7.54913e-42	0.71173	0.268	0.182	1.78544e-37	Retina neurogenesis	her12
2.59959e-40	0.289224	0.871	0.795	6.14828e-36	Retina neurogenesis	atf7ip
1.10574e-28	0.763414	0.263	0.197	2.61518e-24	Retina neurogenesis	her15.2
1.04114e-16	0.328968	0.131	0.092	2.46241e-12	Retina neurogenesis	her4.2
1.88351e-11	0.581513	0.344	0.301	4.45469e-07	Retina neurogenesis	her15.1
0.000570434	0.322535	0.152	0.133	1	Retina neurogenesis	her4.4
0	1.66261	0.245	0.015	0	Hindbrain	AL845362.1
[truncated: 10,097 more rows]
