# Supplementary material for: Glial betaPix is essential for blood vessel development in the zebrafish brain
Source: eLife. 2026 Jan 16;14:RP106665. doi: 10.7554/eLife.106665 (PMC12810955; doi:10.7554/eLife.106665)
Supplement: Supplementary file 2. [file elife-106665-supp2.xlsx]

## Sheet: Supplementary File 2
Supplementary File 2 | Primers used for siRNA
Gene	Forward
betaPIX	AGCCUUCAGAUGAGGAGUUCGCGUC
STMN1	UAAAGAGAACCGAGAGGCA
