# Supplementary material for: Glial betaPix is essential for blood vessel development in the zebrafish brain
Source: eLife. 2026 Jan 16;14:RP106665. doi: 10.7554/eLife.106665 (PMC12810955; doi:10.7554/eLife.106665)
Supplement: Supplementary file 3. [file elife-106665-supp3.xlsx]

## Sheet: Supplementary File 3
Supplementary File 3 | Primers used for guide RNA synthesis
oligo
betaPix-1	TAATACGACTCACTATAGGATGCCTGCAAAAATCCTTGTTTTAGAGCTAGAAATAGC
betaPix-2	TAATACGACTCACTATAGGACGAGTTATCCTTCAGCAGTTTTAGAGCTAGAAATAGC
betaPix-3	TAATACGACTCACTATAGGCGCTCTCAATGGCAAAACGTTTTAGAGCTAGAAATAGC
betaPix-4	TAATACGACTCACTATAGGAGAGTTCATGGAAAGTAAGTTTTAGAGCTAGAAATAGC
stmn1a-1	TAATACGACTCACTATAGAGCTGGACAAGCGTGCTTCGTTTTAGAGCTAGAAATAGC
stmn1a-2	TAATACGACTCACTATAGAAGAAGGACCTTTCCTTGGGTTTTAGAGCTAGAAATAGC
stmn1a-3	TAATACGACTCACTATAAGAAAAGCGTGAGCATGAAAGTTTTAGAGCTAGAAATAGC
stmn1a-4	TAATACGACTCACTATAGAAACTGAACCAGAAAATGGGTTTTAGAGCTAGAAATAGC
stmn1b-1	TAATACGACTCACTATAGGACAAGCGTGCCTCAGGACGTTTTAGAGCTAGAAATAGC
stmn1b-2	TAATACGACTCACTATAGGGAATTCTCCCTTGGCATCGTTTTAGAGCTAGAAATAGC
stmn1b-3	TAATACGACTCACTATAGGAAAGTGGGAATTCTCCCTGTTTTAGAGCTAGAAATAGC
stmn1b-4	TAATACGACTCACTATAGGAGGTCCTTCAGAAAGCTAGTTTTAGAGCTAGAAATAGC
stmn4l-1	TAATACGACTCACTATAGAGCAGAAGAGAGACACTAGGTTTTAGAGCTAGAAATAGC
stmn4l-2	TAATACGACTCACTATAGGGAATTATCAAAGACATGGGTTTTAGAGCTAGAAATAGC
stmn4l-3	TAATACGACTCACTATAAGTGAAGGGTCCCGGCGAGGGTTTTAGAGCTAGAAATAGC
stmn4l-4	TAATACGACTCACTATAGGCTCACATCGCCGCCATGCGTTTTAGAGCTAGAAATAGC
zfhx3-1	TAATACGACTCACTATAGGGAGAGGGAGCTCACCAAAGTTTTAGAGCTAGAAATAGC
zfhx3-2	TAATACGACTCACTATAGGGCGATCCCTCACTTGGAGGTTTTAGAGCTAGAAATAGC
zfhx3-3	TAATACGACTCACTATAGGGCTCCACAGTTGGCAGCTGTTTTAGAGCTAGAAATAGC
zfhx3-4	TAATACGACTCACTATAGGCCCACTTCGTGAGCAATGGTTTTAGAGCTAGAAATAGC
zfhx4-1	TAATACGACTCACTATAGGTTGTCTTCATCTGGAGGAGTTTTAGAGCTAGAAATAGC
zfhx4-2	TAATACGACTCACTATAGGAACTGAAACCACTAAAGGGTTTTAGAGCTAGAAATAGC
zfhx4-3	TAATACGACTCACTATAGGAAGTGCGGAAAGAACGCTGTTTTAGAGCTAGAAATAGC
zfhx4-4	TAATACGACTCACTATAGGCTGGCAAGTTGAGTACATGTTTTAGAGCTAGAAATAGC
UgRNA	TAATACGACTCACTATAGGGAGGCGTTCGGGCCACAGGTTTTAGAGCTAGAAATAGC
Universal bottom-strand Ultramer	AAAAGCACCGACTCGGTGCCACTTTTTCAAGTTGATAACGGACTAGCCTTATTTTAACTTGCTATTTCTAGCTCTAAAAC
