# Supplementary material for: Glial betaPix is essential for blood vessel development in the zebrafish brain
Source: eLife. 2026 Jan 16;14:RP106665. doi: 10.7554/eLife.106665 (PMC12810955; doi:10.7554/eLife.106665)
Supplement: Supplementary file 4. [file elife-106665-supp4.xlsx]

## Sheet: Supplementary File 4
Supplementary File 4 | Primers used for WISH probe synthesis
Gene	Forward	Reverse*
alphaPix	GGACACTCTCGATCCCAAACTGAC	GCCACACACTCCCGTCTCAC
betaPix	GCCATACACTGCCCTCTCACC	GCAGCTTTGCCAGACCACATC
RFP	GTGTCTAAGGGCGAAGAGCTGAT	CAGTTTGCTAGGGAGGTCGCAG
stmn1a	GGCTGCTACAAGTGACATTCAGG	GCAGACAGTAACAGGCATGTTAAGC
stmn1b	GCGTCCTCTGGAGCTGATATCC	GGCAGTGGCAAAACTGGCAC
stmn2a	CTGGAGGCGGCTGAGGAC	CAAGCTGTCTATCCGAAGGGTCC
stmn4l	ATGACTCTCGCCGCGTACAG	GATGCAAGTCAACTGTGGCCAC
vegfaa	ACTCACCGCAACACTCCACT	GAGCAAGGCTCACAGTGGTT
zfhx3	CTGAGCAGCACGAAGTGGATG	CAATCTGATGGAGTCCGATCCTACAC
zfhx4	GTTACAGGACAACGCGCATATCC	CACCCTTGACAGCGTTCACATTC
*The T7 sequence TAATACGACTCACTATAGGG was added to the 5' end of each reverse primer.
