# Supplementary material for: Glial betaPix is essential for blood vessel development in the zebrafish brain
Source: eLife. 2026 Jan 16;14:RP106665. doi: 10.7554/eLife.106665 (PMC12810955; doi:10.7554/eLife.106665)
Supplement: Supplementary file 5. [file elife-106665-supp5.xlsx]

## Sheet: Supplementary File 5
Supplementary File 5 | Primers used for qRT-PCR
for zebrafish
Gene	Forward	Reverse
alphaPix	ATGTTAAACCTTTAACCATGCCTGG	TTAGTGACCTCCTTCATCCCAGGAA
betaPix	GACCAAAGGCTCCGACAAAC	GGCCTTGGGTGGACTCTTC
cre	AATTTACTGACCGTACACCAAA	ATAACCAGTGAAACAGCATTGC
gapdh	GATACACGGAGCACCAGGTT	GCCATCAGGTCACATACACG
pak1	CTCTGCTGGGAGTATAGTCAGCG	CTGCTGCTGCAGGTTCATCTG
ppfia3	CCAGACGAGGATGGCACTAAGAC	CCCTTGGAGATGCATCGCTCTG
RFP	GTGTCTAAGGGCGAAGAGCTGAT	GGTGGTTGTTCACGGTGCC
stmn1a	GGCTGCTACAAGTGACATTCAGG	CATAGCTGCCATAATTGCTGTACGG
stmn1b	GCGTCCTCTGGAGCTGATATCC	CTGCCTCATGGTTCTTGCGTC
stmn4l	CACATTCCCACCTCGCCG	CTCAGCATGCTTGTCCTTCTCC
vegfaa	TCCAGGAGTATCCCGATGAG	GCTTTGACTTCTGCCTTTGG
zfhx3	GCCACTGTGGCAGCATCAG	CAGGCTCAGCATCTGCCAC
zfhx4	GAGCAGGTGCAGCAATGCC	CGCAGCTGAATGCAATGCAAG
ZO-1	CCGAACCCATCAACCGCATC	GAGTGAGATCCTTGGCACTCGG
for human
Gene	Forward	Reverse
betaPIX	CCTCACGGAACACAGTGAGGAG	GTCAGGATCTGCAGCTCAAGC
gapdh	CGCTGAGTACGTCGTGGAGTC	CAGGAGGCATTGCTGATGATCTTG
pak1	GTGAAGGCTGTGTCTGAGACTC	GGAAGTGGTTCAATCACAGACCG
stmn1	GAACTGGAGAAGCGTGCCTCAG	CTTCAGTCTCGTCAGCAGGGTC
VEGFA	CCATGCCAAGTGGTCCCAG	GGTCTCGATTGGATGGCAGTAGC
ZFHX3	CCACGGACCCAGAAGAAGCC	CTTCTCTGCTTGGCTGGACG
ZFHX4	CAGAGGAGGACAACCTCAGTGAG	CCTCACTTTGTTCTTCTGAGGTCG
ZO-1	CCTGGGGCTGTCTCAACTCC	CATGCTGGGCCGAAGAATCC
